# Supplementary material for: Haplotyping SNPs for allele-specific gene editing of the expanded huntingtin allele using long-read sequencing
Source: PubMed Central journal article supplement (PMC9574884; doi:10.1016/j.xhgg.2022.100146), 2022-09-26
Supplement: mmc10.pdf [file mmc10.pdf]

# Haplotyping SNPs for allele-specific gene editing of the expanded huntingtin allele using long-read sequencing

Li Fang,<sup>1,6</sup> Alex Mas Monteys,<sup>1,6</sup> Alexandra Dürr,<sup>2</sup> Megan Keiser,<sup>1</sup> Congsheng Cheng,<sup>1</sup>

**Q1** Ahkil Harapanahalli,<sup>1</sup> Pedro Gonzalez-Alegre,<sup>1,3,4</sup> Beverly L. Davidson,<sup>1,5,\*</sup> and Kai Wang<sup>1,5,\*</sup>

## Summary

Huntington's disease (HD) is an autosomal dominant neurodegenerative disease caused by CAG trinucleotide repeat expansions in exon-1 of *huntingtin* (*HTT*). Currently, there is no cure for HD, and the clinical care of individuals with HD is focused on symptom management. Previously, we showed allele-specific deletion of the expanded *HTT* allele (*mHTT*) using CRISPR-Cas9 by targeting nearby (<10 kb) SNPs that created or eliminated a protospacer adjacent motif (PAM) near exon-1. Here, we comprehensively analyzed all potential PAM sites within a 10.4-kb genomic region flanking exon-1 of *HTT* in 983 individuals with HD using a multiplex targeted long-read sequencing approach on the Oxford Nanopore platform. We developed computational tools (NanoBinner and NanoRepeat) to de-multiplex the data, detect repeats, and phase the reads on the expanded or the wild-type *HTT* allele. One SNP common to 30% of individuals with HD of European ancestry emerged through this analysis, which was confirmed as a strong candidate for allele-specific deletion of the *mHTT* in human HD cell lines. In addition, up to 57% HD individuals may be candidates for allele-specific editing through combinatorial SNP targeting. Cumulatively, we provide a haplotype map of the region surrounding exon-1 of *HTT* in individuals affected with HD. Our workflow can be applied to other repeat expansion diseases to facilitate the design of guide RNAs for

**Q2** allele-specific gene editing.

## **Q6 Q7 Q8** Introduction **Q3 Q4 Q5**

Huntington's disease (HD) (MIM: 143100) is an autosomal dominant neurodegenerative disease that affects 10.6–13.7 individuals per 100,000 in populations of European ancestry.<sup>1–4</sup> Individuals with HD suffer from progressive motor, cognitive, and psychiatric disturbances over the course of 10–20 years.<sup>5,6</sup> At the molecular level, HD is caused by a CAG trinucleotide repeat expansion in exon-1 of the huntingtin (*HTT*, MIM: 613004) gene located at chromosome 4p16.3.<sup>1</sup> In the normal population, the CAG repeat is in the range of 6–35.<sup>2</sup> When expanded to  $\geq 35$  repeats, HD is likely to develop. In individuals with 36–39 repeats, there is partial penetrance<sup>2</sup> with full penetrance when there are  $\geq 40$  repeats. The predicted rate by which an individual with CAG expansion will develop HD is determined by the longest expanded allele in a completely dominant manner.<sup>7</sup>

Currently, there is only symptomatic treatment for individuals with HD.<sup>2</sup> Earlier studies using mouse models showed that HD-like phenotypes can be resolved if the expression of the expanded *HTT* (*mHTT*) allele is reduced, even at later disease stages,<sup>8–10</sup> suggesting that reducing *HTT* expression, and in particular expanded *HTT* expression, may be clinically relevant.

Gene-silencing strategies using RNA interference (RNAi) or antisense oligonucleotides (ASOs) have been efficacious in mouse models.<sup>9–11</sup> One trial done in collaboration between Ionis Pharmaceuticals and Roche approached non-allele selective silencing for HD individuals<sup>12</sup> (ClinicalTrials.gov identifiers: NCT02519036 and NCT03342053). Phase III studies were ended early because participants receiving active drug progressed more rapidly than placebo-treated participants<sup>13</sup> (ClinicalTrials.gov identifier: NCT03761849). In addition, two allele-selective ASOs were tested in individuals with HD (PRECISION-HD1 and PRECISION-HD2; ClinicalTrials.gov identifiers: NCT03225833 and NCT03225846) with results released recently. Unfortunately, neither ASO showed target engagement in cerebrospinal fluid. The PRECISION-HD2 core trial participants who received WVE-120102 (targeting rs362331) had a median reduction of 9.9% in *mHTT* in cerebrospinal fluid ( $p = 0.74$ ) compared with the placebo group, who had a median decrease in *mHTT* of 0.8%. Results of the PRECISION-HD1 core trial were similar.<sup>14</sup> Thus, it is important to develop and test additional gene-silencing strategies.

The recently discovered CRISPR-Cas9 system<sup>15–17</sup> is a promising genome editing technology for genetic disorders such as HD. In this system, the Cas9 protein is co-expressed with single guide RNAs (sgRNAs) that together

<sup>1</sup>Raymond G. Perelman Center for Cellular and Molecular Therapeutics, Children's Hospital of Philadelphia, Philadelphia, PA 19104, USA; <sup>2</sup>Sorbonne Université, Paris Brain Institute, AP-HP, INSERM, CNRS, University Hospital Pitié-Salpêtrière, Paris, France; <sup>3</sup>Huntington's Disease Center and Division of Movement Disorders, Department of Neurology, The University of Pennsylvania, Philadelphia, PA 19104, USA; <sup>4</sup>Spark Therapeutics, Philadelphia, PA 19104, USA; <sup>5</sup>Department of Pathology and Laboratory Medicine, University of Pennsylvania Perelman School of Medicine, Philadelphia, PA 19104, USA

<sup>6</sup>These authors contributed equally

\*Correspondence: davidsonbl@chop.edu (B.L.D.), wangk@chop.edu (K.W.)

<https://doi.org/10.1016/j.xhgg.2022.100146>

© 2022 The Author(s). This is an open access article under the CC BY license (<http://creativecommons.org/licenses/by/4.0/>).

form a ribonucleoprotein complex (sgRNA-Cas9 complex) that binds specific genomic DNA sequences and mediates a double-strand DNA (dsDNA) break. Targeted gene deletions can be made by non-homologous end-joining when a pair of sgRNA-Cas9 complexes bind either end of the DNA target and produce dsDNA breaks. Targeting specificity of the sgRNA-Cas9 complex is regulated by two factors: (1) the binding affinity of the 20-nt sgRNA with the complementary genomic DNA sequence; and (2) the recognition of a protospacer adjacent motif (PAM) immediately following the genomic DNA/sgRNA complementary region.<sup>15,16</sup> While mismatches on the sgRNA/DNA complementary sequence are tolerable, the presence of an intact PAM motif is critical, and mutations on the PAM sequence cause ablation of cleavage.<sup>18,19</sup> Therefore, allele-specific gene editing could be achieved by taking advantage of SNPs that either eliminate or create PAM sequences.

We<sup>20,21</sup> and other groups<sup>22</sup> previously reported allele-specific editing of the *mHTT* allele *in vitro* and *in vivo*, taking advantage of SNPs identified for use with the CRISPR/SpCas9 system. However, these studies mainly screened common SNPs in the normal population and a detailed haplotype map surrounding exon-1 of the HD population is unknown. To more broadly adapt this approach to the HD population, we developed a robust, high-throughput pipeline to detect and phase all highly prevalent SNPs in the HD population that, when present, create a PAM *cis* to the expanded HTT allele that can be used together with the CRISPR systems. Notably, haplotype analysis of HD cohorts has been reported previously,<sup>23,24</sup> with a focus on allele specific ASO or miRNA-based silencing strategies targeting the spliced and unspliced transcript. Given that the *HTT* gene is 170 kb in length, most SNPs analyzed were distant from exon-1, yet, for deletion of the CAG-repeat, a haplotype map surrounding exon-1 is required. Because we found earlier that editing efficacy reduces with increasing distance from exon-1,<sup>20</sup> we focused our analysis within 10 kb of exon-1.

To address this problem, we used Oxford Nanopore long-read sequencing paired with two novel computational tools (NanoBinner and NanoRepeat) to de-multiplex data, detect repeat size, and haplotype the allele. This was applied to 319 samples from the French HD consortium and validated on 664 samples from the CHDI Foundation, which consists of DNA samples from multiple continents and ethnic groups. We identified all common SNPs in the French and CHDI HD cohorts, and analyzed all SNPs that provide PAMs to mediate CRISPR editing of the expanded *HTT* allele.

## Material and methods

### HD subjects

HD subjects from the French cohort were recruited at the Pitié Salpêtrière Hospital in Paris, France. All subjects gave written informed consent, and blood samples were collected in accor-

dance with local French regulations (Paris Necker ethics committee approval [RBM 03-48] to A.D.). Genomic DNA samples from the CHDI cohort were generously provided by the participants in the Enroll-HD study and made available by the CHDI Foundation. Detailed information of the HD subjects (including race, sex, region, and CAG repeat sizes) is shown in [Tables S11](#) and [S12](#). Enroll-HD is a global clinical research platform intended to accelerate progress toward therapeutics for HD; certain samples and core datasets are collected annually on all research participants as part of this multi-center longitudinal observational study. Enroll-HD is sponsored by the CHDI Foundation, a nonprofit biomedical research organization exclusively dedicated to developing therapeutics for HD.

### Barcode design for multiplexed long-read sequencing

The barcode design workflow used in this study is shown in [Figure S1A](#). We designed our in-house barcode sequences, which met the following criteria: (1) there was no homopolymer that was longer than 2 bp (e.g., “TT” was allowed but “TTT” was not allowed); (2) there was no tandem repeat; (3) GC content is within 40%–60%; (4) the barcode sequence cannot be mapped to human reference genome GRCh38 so that its binding with human genomic DNA during the PCR process is minimized; (5) pairwise sequence similarity between every two barcodes was minimized. To meet this goal, we first generated an excessive amount (20,000) of barcode sequences that meet criteria 1–3. Next, we aligned the barcode sequences to the GRCh38 reference genome using the blastn algorithm,<sup>25,26</sup> and removed any barcodes aligned to GRCh38. Then we used a graph-based algorithm to find a set of barcodes where there was no pairwise alignment (blastn algorithm, word size = 6) between any two barcodes ([Figure S1B](#)). Each barcode was a node in the graph. Initially, all nodes are connected in the undirected graph. We performed an all-vs-all alignment of the barcode sequences using the blastn algorithm (word size = 6). We removed the edge between two barcodes (nodes) if the two barcodes were aligned. The remaining edges only connect barcode pairs that have no alignment. Therefore, a complete subgraph (clique) is a set of barcodes in which any two barcodes have no alignment. We used the networkx python package to find the cliques with enough nodes (number of barcodes). We first designed a set of 16-bp barcodes for amplicon-1 ([Table S1](#); [Figure S1](#)). After analysis of the sequencing data of amplicon-1, we found that the first a few bases were trimmed in some of the reads and thus longer barcode sequences might be better for the de-multiplexing process. We designed 32-bp barcodes for amplicon-2 ([Table S2](#)) and amplicon-3 ([Table S3](#)).

### Barcoded long-range PCR to amplify the region flanking exon-1 of the *HTT* gene

For the French HD cohort, the target region was covered by two overlapping amplicons (amplicon-1 and amplicon-2; [Figure 1F](#)). Amplicon-1 mainly covers the upstream region of the CAG repeat region (GRCh38, chr4:3069608-3075517). The amplicon length (without barcode) is 5,910 bp. Amplicon-2 mainly covers the downstream region of the CAG repeat region (GRCh38, chr4:3071119-3079972). The amplicon length (without barcode) is 8,854 bp. For each amplicon, ten different barcodes were added to the 5' side of both forward and backward primers. The complete primer sequences are listed in [Tables S1](#) and [S2](#). The combination of the both forward and backward primers can be used to multiplex 100 samples. The French HD cohort contains 396 HD

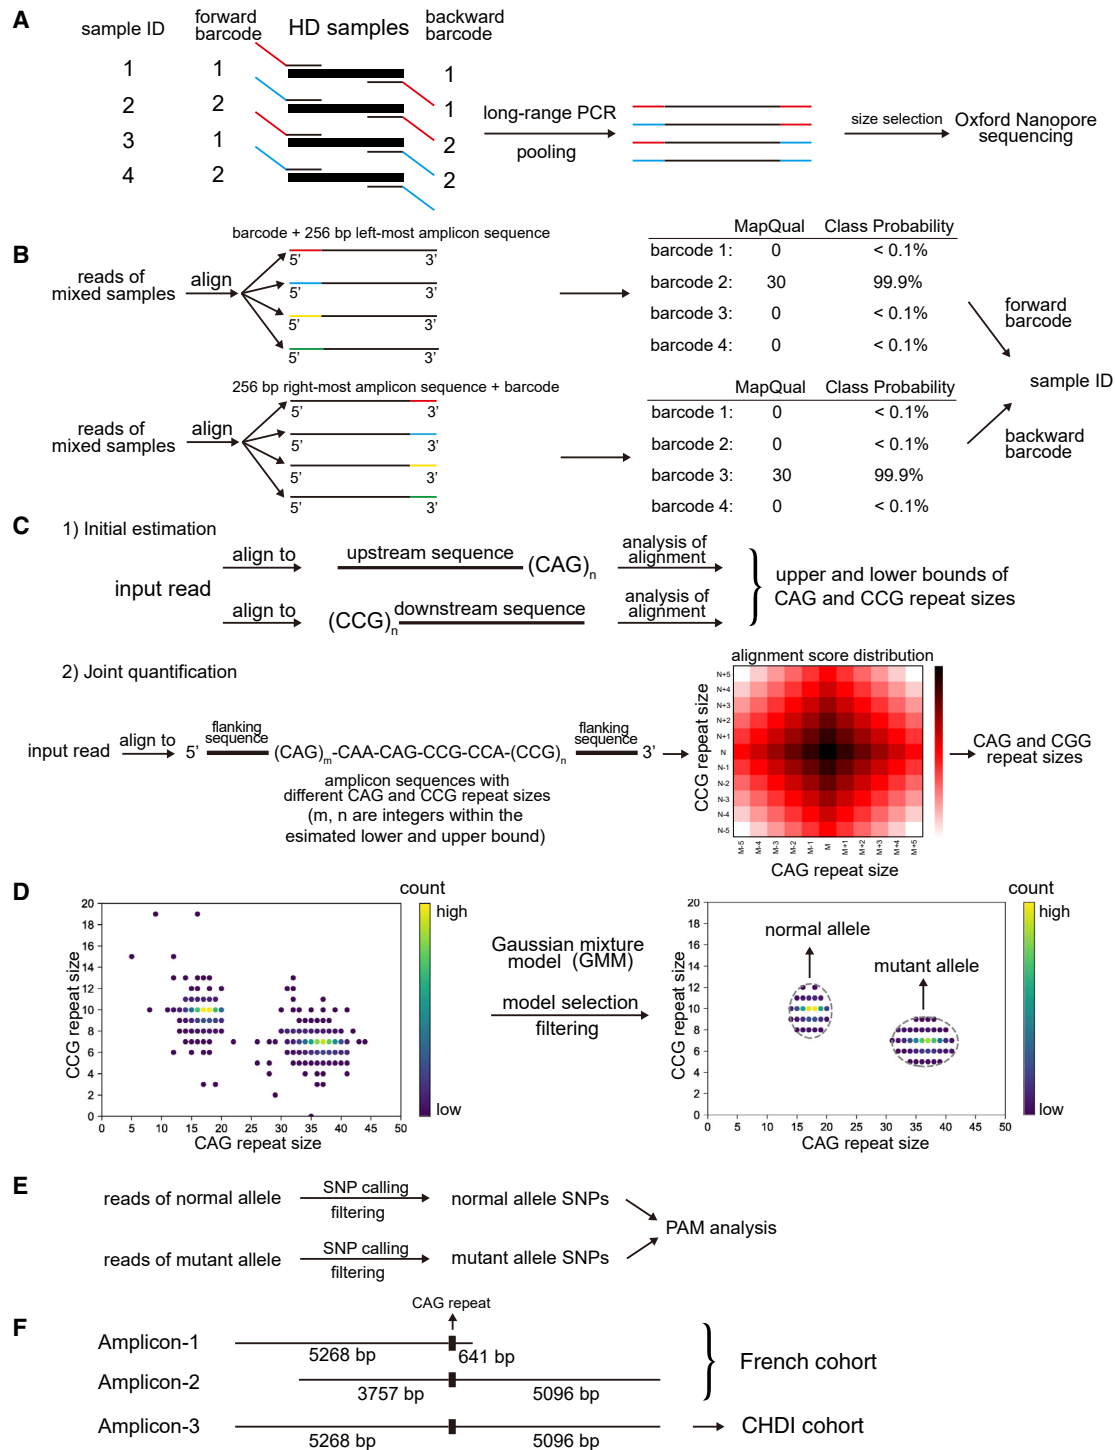

**Figure 1. Sequencing and data analysis workflow**

(A) Barcodes were added to both forward and backward PCR primers and the pooled PCR products of multiple samples were sequenced with Oxford nanopore sequencing.

(B) De-multiplexing strategy of NanoBinner. NanoBinner aligns a read to barcode sequences with the 256-bp amplicon sequence immediately next to it. The 256-bp amplicon sequence acts as an anchor so that the matching of barcodes is at the correct position. NanoBinner assigns a read to a barcode if the Phred scale mapping quality score is  $\geq 30$ .

(C) Joint quantification of CAG and CCG repeat sizes using NanoRepeat. NanoRepeat first estimates the upper and lower bounds of the CAG and CCG repeat sizes separately, and then performs a joint quantification to refine the repeat sizes. In the joint quantification step, NanoRepeat generates a series of template sequences with  $m$  CAG repeats and  $n$  CCG repeats, where  $m$  and  $n$  are all integers within the upper and lower bounds determined in the first step. A read was aligned to this series of template sequences. The CAG and CCG repeat sizes that maximize the alignment score was the final estimates of the repeat sizes of the read.

(legend continued on next page)

genomic DNA samples which were stored in five 96-well plates where plates 1–4 each contain 95 samples and plate 5 contains 16 samples. For each plate of plates 1–4, we performed barcoded PCR with 95 barcode combinations, and the pooled samples were then sequenced in one Nanopore flow cell (described below). Samples in plate 5 were sequenced together with the QC-failed samples of plates 1–4. The long-range PCR was performed using the PrimeSTAR GXL DNA Polymerase (Takara Bio USA). The PCR conditions are: (1) 95°C for 3 min; (2) 98°C for 10 s; (3) 68°C for 10 min. Steps 2 to 3 were repeated for 30 cycles.

For the CHDI HD cohort, the target region was covered by one single amplicon (amplicon-3; Figure 1F). The forward primer is the forward primer of amplicon-1 and the backward primer is the backward primer of amplicon-2. The amplicon length (without barcode) is 10,365 bp. Twenty-four different barcodes were added to the 5' side of both forward and backward primers. The combination of both forward and backward primers can be used to multiplex 576 samples. The CHDI HD cohort contains 960 samples, which were stored in ten 96-well plates. We multiplex 480 samples (five plates) at a time. The PCR condition and sequencing process are the same as the French HD cohort.

### Long-read sequencing of the barcoded PCR products

The barcoded PCR products were pooled and purified with Agencourt AMPure XP beads (Beckman Coulter, A63881). The sequencing library was prepared using a ligation sequencing kit (Oxford Nanopore Technology [ONT], SQK-LSK109), according to manufacturer's instructions.

- (1) DNA repair, end repair, and dA-tailing: 1 µg of the pooled and purified PCR products was used as input DNA, and the volume was adjusted to 47 µL with nuclease-free water. One microliter of DNA CS (ONT, SQK-LSK109), 47 µL input DNA, 3.5 µL NEBNext FFPE DNA Repair Buffer (NEB, M6630), 2 µL NEBNext FFPE DNA Repair Mix (NEB, M6630), 3.5 µL Ultra II End-prep reaction buffer (NEB, E7546), and 3 µL Ultra II End-prep enzyme mix (NEB, E7546) were mixed in a PCR tube. The mixture was incubated at 20°C for 5 min and 65°C for 5 min. A 1× volume (60 µL) AMPure XP clean-up was performed, and the DNA was eluted in 61 µL nuclease-free water. A 1-µL aliquot was quantified by fluorometry (Qubit) to ensure  $\geq 700$  ng DNA was retained.
- (2) Adapter ligation: 60 µL DNA sample from the previous step, 25 µL Ligation Buffer (ONT, SQK-LSK109), 10 µL NEBNext Quick T4 DNA Ligase (NEB, E6056), and 5 µL Adapter Mix (ONT, SQK-LSK109) were mixed in order. The mixture was incubated for 10 min at room temperature. The adaptor-ligated DNA was cleaned up by adding a 0.4× volume (40 µL) of AMPure XP beads, incubating for 5 min at room temperature, and resuspending the pellet twice in 250 µL Long Fragment Buffer (ONT, SQK-LSK109). The purified-ligated DNA was resuspended in 15 µL elution buffer (ONT, SQK-LSK109). A 1-µL aliquot was quantified by fluor-

ometry (Qubit) to ensure  $\geq 300$  ng DNA was retained. A total of 50 fmol (278 ng) of this final prepared library was loaded onto the GridION sequencer with an FLO-MIN106D (R9.4.1) flow cell. The sequencing was run for 48 h. Basecalling was performed using the super-accuracy model of Guppy (v.5.0.14).

### Demultiplexing of the sequencing data with NanoBinner

We developed NanoBinner, a tool for de-multiplexing of barcoded amplicons from long-read sequencing data. Given the moderate error rate in long reads, there might be random matches of barcodes inside the amplicon sequence. To avoid this potential issue, NanoBinner aligns the barcode sequence as well as the 256-bp amplicon sequence next to it. The 256-bp amplicon sequence acts as an anchor so that the matching of barcodes is at the correct position. The alignment is performed using minimap2<sup>27</sup> with the parameter for nanopore reads (-x map-ont). This parameter can be changed if the input is PacBio reads. Minimap2 calculates a mapping quality score for each barcode, which is the Phred scale of the probability that a read is misplaced. NanoBinner assigns a read to a barcode if the Phred scale mapping quality score is  $\geq 30$ . In our case, the combination of the two barcodes on both sides determines the sample. A read was assigned to a specific sample if the barcodes on both sides were confidently determined. One FASTQ file was generated for each sample.

### Repeat detection and read phasing with NanoRepeat

NanoRepeat can quantify a single tandem repeat or jointly quantify two adjacent repeats. In this study, we jointly quantify the CAG and CCG repeats in the *HTT* gene. The joint quantification process has two steps: fast estimation and refining. In the fast estimation step, NanoRepeat performs a quick analysis of each repeat and estimates the lower and upper bound of the repeat size independently. This analysis is done by aligning the reads to a decoy reference sequence with 1,000 repeat units (CAG or CCG) using minimap2.<sup>27</sup> Given the sequencing error rate, the alignment has some tolerance of mismatches and, thus, the nearby non-repeat region in the reads might be forced to be aligned with the decoy reference sequence. Therefore, the upper bound of the repeat size is the number of aligned repeat units in the decoy reference sequence. We assign the lower bound of the repeat size as the number of repeat units in the read that exactly matched the reference sequence with no error. Let  $L_1, L_2$  denote the lower bounds of the CAG and CCG repeats, and  $U_1, U_2$  denote the upper bounds of the two repeats, respectively. In the refining step, NanoRepeat generates a batch of amplicon sequences with  $m$  ( $L_1 \leq m \leq U_1$ ) CAG repeat units and  $n$  ( $L_2 \leq n \leq U_2$ ) CCG repeat units (Figure 1C). Each read is aligned to this batch of amplicon sequences with minimap2.<sup>27</sup> The  $m$  and  $n$  that maximize the alignment score were the estimated CAG and CCG repeat sizes of the read.

After the repeat number of each read is determined, NanoRepeat classifies the reads to alleles. First, we remove outlier reads with

(D) NanoRepeat separates reads using GMM. CAG and CCG repeat sizes are used as input features. The scatterplot shows the CAG and CCG repeat sizes of a typical example. The color of the points indicates the number of reads. Model selection is performed to select the best number of Gaussian models. After filtering outliers, the two alleles are well separated (right). The dashed gray circles are equi-probability surfaces of the fitted Gaussian models where the probability outside the surface is less than 5%.

(E) SNPs detection was performed using longshot. Low quality SNP calls were removed. The effects of on PAMs were examined.

(F) Locations of the PCR amplicons of each cohort. The lengths are the distance to the first nucleotide of the CAG repeat (based on GRCh38).

repeat sizes that are outside three standard deviations from the mean. Next, we assume that the CAG and CCG repeat sizes ( $m, n$ ) are distributed according to a mixture of  $N$  Gaussian models, where  $N$  is 1 or 2 as human is a diploid genome. Akaike information criterion or Bayesian information criterion are commonly used criteria to select the best value of  $N$  and prevent overfitting. As Gaussian distribution is a probability distribution of real-valued random variables, we found that these two methods are not able to prevent overfitting of the Gaussian mixture model (GMM) if the input random variables are rounded to integers. Therefore, we added a uniform distributed random noise (between  $-0.5$  and  $0.5$ ) to each  $m$  and  $n$  before model selection using Bayesian information criterion. After the best  $N$  is selected, we use the original value of  $m$  and  $n$  (without the random noise) to train the GMM. The label of each read was predicted using the trained model. To make sure the subsequent SNP calling is accurate, a read is discarded if it is not within 95% equi-probability surface of a Gaussian model. A sample failed QC if only one allele was detected ( $N = 1$ ) or one of the alleles had less than 50 reads.

### SNP/indel detection

To reduce the computational time, the reads of each allele were down-sampled to  $200\times$  coverage and then aligned to the human reference genome GRCh38 using minimap2<sup>27</sup> with the parameter for nanopore reads ( $-x$  map-ont). The SAM file was converted to BAM file and sorted by SAMtools.<sup>28</sup> SNP/indel calling was performed using longshot<sup>29</sup> with default parameters. Homozygous calls of each allele were considered accurate and were used in downstream analysis.

### Generation of consensus sequence and structural variant detection

Reads of each allele were assembled by Canu (version: 2.0),<sup>30</sup> and a consensus sequence was generated. The consensus sequence was aligned to the reference genome GRCh38 using minimap2<sup>27</sup> with the parameter for assembly contigs ( $-x$  asm20). Structural variants (SVs) were called directly from the alignment using a custom pipeline.

### Analysis of gain and loss of PAMs mediated by SNPs

An SNP is considered to mediate the gain of a PAM if the alternative allele contains a high-efficiency PAM and the reference allele does not contain any high-efficiency PAM or low-efficiency PAM of the same CRISPR enzyme. Conversely, an SNP is considered to mediate the loss of a PAM if the reference allele contains a high-efficiency PAM and the alternative allele does not contain any high-efficiency PAM or low-efficiency PAM. TTTN is a high-efficiency PAM of AsCpf1. Both NGG and NAG are considered high-efficiency PAMs of the wild-type SpCas9, although the recognition for NAG is less efficient than NGG. For other Cas9 enzymes of which the post-selection PAM depletion values (PPVDs) are measured,<sup>31</sup> a PAM is considered as a high-efficiency PAM if the PPVD is less than 0.2 (5-fold depletion). The list of high-efficiency and low-efficiency PAMs analyzed in this study is shown in Table S5.

### Sanger sequencing to validate SNP16 (rs3856973)

A 526-bp region flanking SNP16 (rs3856973, chr4:3078446G>A on GRCh38) was amplified by a nested PCR as we were not able to design a specific primer that directly amplifies this region. In

the first round of the nested PCR, we used the primers of amplicon-2 (Table S2), which amplified an 8.8-kb region. The PCR condition was described in the above section. One microliter of the PCR product was used as the input of the second round of PCR. In the second round, the primers were 5'-TTGGGAGG GTCCTCACAGTA-3' (forward) and 5'-GAGGTTGCAGTGAGC CAAGA-3' (backward). The PCR conditions were: (1) 95°C for 3 min; (2) 98°C for 10 s; (3) 68°C for 45 s (30 cycles). Sanger sequencing was performed using the forward primer of the second-round PCR.

### TaqMan SNP genotyping assay to validate SNP16

The TaqMan Genotyping Master Mix (cat. no. 4,371,353) and the probes for SNP16 (assay ID: C\_27529960\_10) were ordered from Thermo Fisher Scientific. A 5- $\mu$ L PCR reaction system was used. Real-time PCR and data analysis were performed following the manufacturer's instructions.

### Cell culture and transfection

Human embryonic kidney (HEK293) cells (obtained from CHOP Research Vector Core stock) were maintained in DMEM medium containing 10% fetal bovine serum, 1% L-glutamine, and 1% penicillin/streptomycin at 37°C with 5% CO<sub>2</sub>. Cells were cultured in 24-well plates and transfected at 80%–90% confluence using Lipofectamine 2000 transfection reagent, according to the manufacturer's protocol. After DNA transfection, cells expressing SaCas9 and sgRNA sequences were enriched by puromycin selection (3  $\mu$ M) for 24 h, and subsequently expanded for genomic DNA and RNA extraction. Human HD fibroblasts (obtained from the Coriell Institute for Medical Research cell repository) were maintained on DMEM medium supplemented with 10% fetal bovine serum, 1% MEM non-essential amino acids, 1% penicillin/streptomycin and 1% L-glutamine at 37°C with 5% CO<sub>2</sub>. DNA transfection was done by electroporation using an Invitrogen Neon transfection reagent using the electroporation conditions (ND33392: 1,450 V, 20 ms, 2 pulses), following the guidelines provided by the manufacturer. Fibroblasts were selected with puromycin (2  $\mu$ M) for 24 h and subsequently expanded for genomic DNA extraction. Cells were not authenticated or tested for *Mycoplasma* by the investigators since they previously passed the quality controls of CHOP Research Vector Core and the Coriell Institute for Medical Research cell repository. None of the cells used in the study were listed in the ICLAC database of commonly misidentified cell lines.

### sgRNA and Cas9 plasmid construction

The plasmid pX330 containing the SpCas9 and sgRNA expression cassettes used in our previous study<sup>20</sup> was used as a template to clone the SaCas9 cDNA and sgRNA sequences. To determine transfection efficacy and for selecting positively transfected cells, a CMV reporter cassette expressing eGFP/P2A/Puromycin fusion protein was cloned downstream of the SaCas9 expression cassette. For all sgRNAs, the guide complementary sequences were cloned using a single cloning step with a pair of partially complementary oligonucleotides. The oligo pairs encoding the genomic complementary guide sequences were annealed and ligated into the BbsI cloning site upstream and in frame with the invariant scaffold of the sgRNA sequence. The gRNA sequences for targeting SNP1, SNP16, and HDi3 are: GCCCCGCTCCAGGCGTCGGCG (SNP1), GATAGGGAAATGTCAGGGTTAA (SNP16), and GTGCTTTTAGG ACGCCTCGGC (HDi3).

## RNA extraction and qRT-PCR

Total RNA was extracted using Trizol (Life Technologies) according to the manufacturer's protocol, with the exception of 1  $\mu$ L of Glycoblue (Life Technologies) in addition to the aqueous phase on the isopropanol precipitation step and a single wash with cold 70% ethanol. RNA samples were quantified by spectrophotometry and subsequently cDNAs generated from 1  $\mu$ g of total RNA with random hexamers (TaqMan RT reagents, Applied Biosystems). To determine human HTT expression levels in HEK293 cells, we used TaqMan probes for human HTT and glyceraldehyde 3-phosphate dehydrogenase mRNAs obtained from Applied Biosystems. Relative HTT gene expression was determined using the ddCt method.

## Semiquantitative PCR for assessment of allele-specific editing

Allele-specific editing was assessed by semiquantitative PCR amplification of the CAG repeat within *HTT* exon-1. Genomic DNA (gDNA) was extracted from cultured HD fibroblasts using a QiaAMP DNA mini kit (QIAGEN) according to manufacturer's instructions. The gDNA was quantified by fluorometry (Qubit) and then diluted to the same concentration (5 ng/ $\mu$ L). We used BIOLASE DNA polymerase (Bioline) to amplify the input DNA templates. As the CAG repeat and its flanking region has a high GC content (72.4%), we added betaine to the PCR reaction system to enhance amplification. The 50- $\mu$ L PCR reaction system contains 8  $\mu$ L gDNA (5 ng/ $\mu$ L), 5  $\mu$ L 10 $\times$  NH<sub>4</sub> buffer, 2  $\mu$ L dNTP mixture (2.5 mM each), 1.5  $\mu$ L MgCl<sub>2</sub> (50 mM), 1  $\mu$ L BIOLASE DNA polymerase, 12  $\mu$ L betaine (5 M), 1  $\mu$ L primer mixture (10  $\mu$ M each), and 19.5  $\mu$ L ddH<sub>2</sub>O. The PCR thermal cycling program was 95°C for 2 min, followed by 25 cycles of 95°C for 15 s, 57°C for 15 s, 72°C for 45 s, and a final extension at 72°C for 5 min. The PCR products were separated by electrophoresis through a 1.5% agarose gel stained with ethidium bromide. The gel bands were quantified using the Image Lab software (Bio-Rad).

## Statistical analysis

Statistical analyses were performed using GraphPad Prism v.7 software. Outlier samples were detected using the Grubb's test ( $\alpha = 0.05$ ). Normal distribution of the samples was determined by using the D'Agostino and Pearson normality test. Data were analyzed using one-way ANOVA followed by Bonferroni's post hoc. Statistical significance was considered with  $p < 0.05$ . All results are shown as the mean  $\pm$  SEM.

## Results

### Sequencing and data analysis workflow overview

The workflow of this study is shown in Figure 1. We used barcoded long-range PCR to amplify the target regions. The barcoded sequences were custom-designed such that: (1) there were neither tandem repeat sequences nor sequences similar to the human genome; (2) the pairwise sequence similarity between each two barcodes was minimized; (3) the GC content is between 40% and 60% (see material and methods; Figure S1). For both HD cohorts, we amplified the same target region (GRCh38, chr4:3069608-3079972), which begins 5,268 bp upstream of the CAG repeat and ends 5,096 bp downstream

(Figure 1F; see material and methods for details). We used a combinatorial barcoding strategy, which adds different barcodes 5' of both forward and backward primers (Tables S1–S3). The barcoded amplicons were pooled, size selected, and then sequenced in a MinION flow cell using the Oxford Nanopore GridION sequencer.

The sequencing data were de-multiplexed with NanoBinner, which was originally developed for this work. Given the moderately high error rate and the flexibility of alignment for long reads, there may be random barcode matches inside the amplicon sequence. To avoid potential random matching, NanoBinner compares the barcode sequence as well as the 256-bp amplicon sequence immediately next to the barcode. The 256-bp amplicon sequence acts as an anchor such that the matching of barcodes is at the correct position. NanoBinner also uses a new algorithm to assign barcodes, which is described in the material and methods section.

After de-multiplexing, CAG repeat sizes are detected by NanoRepeat, a novel repeat detection tool originally developed for this study. Through use of a novel algorithm, it jointly quantifies two adjacent tandem repeats, phases the reads using repeat sizes from both repeats, and reports haplotypes. In exon-1 of *HTT*, there is a CCG repeat immediately 3' of the CAG repeat, with (CCG)<sub>7</sub> and (CCG)<sub>10</sub> predominant although there are other variants.<sup>32–34</sup> The joint quantification of the CAG and CCG repeat has two steps. First, NanoRepeat performs a quick analysis of each repeat and independently determines the lower bound and upper bound of the repeat size. Next, NanoRepeat generates a batch of amplicon sequences with  $m$  ( $L_1 \leq m \leq U_1$ ) CAG repeat units and  $n$  ( $L_2 \leq n \leq U_2$ ) CCG repeat units, where  $L_1$ ,  $L_2$  are the lower bounds of the two repeats and  $U_1$ ,  $U_2$  are the upper bounds of the two repeats, respectively (Figure 1C). Each read is aligned to this batch of amplicon sequences using minimap2.<sup>27</sup> The  $m$  and  $n$  that maximize the alignment score are the estimated CAG and CCG repeat sizes of the read (see material and methods for details). After the joint quantification, NanoRepeat uses the GMM to group the reads to alleles. Outlier reads are removed so that the subsequent SNP calling is accurate. At least 50 reads per allele are required for SNP calling. SNPs/Indels were detected using longshot.<sup>29</sup>

### Assessment of computational methods

We first tested the accuracy of repeat quantification in whole-genome sequencing data. We used the Oxford Nanopore dataset of the CHM13 genome.<sup>35</sup> The CHM13 cell line has near-complete homozygosity, with only a few exceptions. The telomere-to-telomere consortium has finished the *de novo* assembly of CHM13 primarily based on PacBio HiFi reads, but supplemented with data from other sequencing platforms. As the CHM13 v.1.1 assembly sequence is highly reliable, repeat counts from the assembly sequence can be considered as a truth set for method assessment. We benchmarked NanoRepeat along with two other widely used repeat detection tools, namely

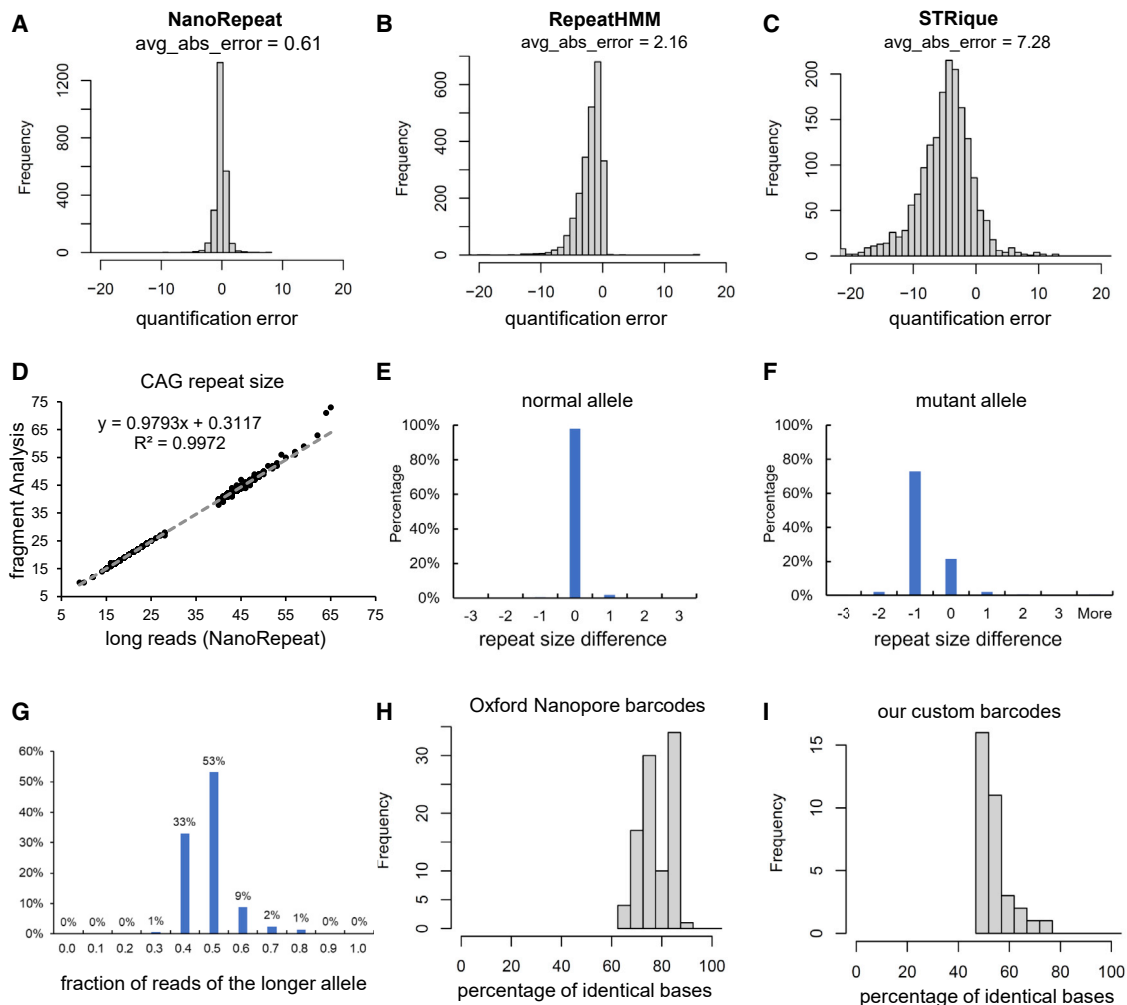

**Figure 2. Assessment of computational methods**

(A–C) Benchmarking repeat quantification on 2370 STR regions in the CHM13 genome. The average absolute error (avg\_abs\_error) of each method is shown.

(D) Scatterplot showing the CAG repeat size quantified by NanoRepeat and PCR-based fragment analysis.

(E and F) Repeat size difference between NanoRepeat’s results and the PCR-based fragment analysis.

(G) Distribution of the fraction of reads of the longer allele.

(H and I) Histogram showing the percentage of identical bases between the barcode sequence and the best aligned sequence in the human reference genome GRCh38. Sequences of 96 Oxford Nanopore barcodes were obtained from the online documentation of the PCR Barcoding Expansion Pack.

RepeatHMM<sup>36</sup> and STRique.<sup>37</sup> Repeat detection was performed on 2,370 short tandem repeat (STR) regions in the CHM13 genome. These are all STR regions that are >100 bp and not within a 500-bp flanking region of another STR. We removed adjacent STRs because many of the adjacent STRs have similar sequences and it is hard to tell if they need to be merged or not without manual examination. The length of the 2,370 STR regions range from 100 to 2,374 bp. Their coordinates are shown in Table S10. The evaluation results are shown in Figures 2A–2C. NanoRepeat has much smaller quantification error compared with RepeatHMM and STRique. In addition, RepeatHMM and STRique have a systematic quantification bias which leads to underestimation of the repeat size.

Next, we assessed repeat detection in our HD samples. The CHDI Foundation provided the repeat sizes quantified

earlier by PCR-based fragment analysis. We compared the repeat size quantified by NanoRepeat and the data provided by the CHDI Foundation. As shown in Figure 2D, NanoRepeat’s quantifications based on the long reads are highly consistent with the results of fragment analysis provided earlier ( $R^2 = 0.9972$ ). For normal alleles, the two methods were identical for approximately 98% of samples (Figure 2E). For expanded alleles, repeat size differences between the two methods were within one repeat unit for more than 95% samples (Figure 2F). There is very little bias between the normal and the expanded alleles (Figure 2G).

We also compared our custom-designed barcodes with the 96 barcodes provided by ONT. We observed that 35 of the 96 barcodes in ONT’s PCR Barcoding Expansion Pack can be aligned to the human reference genome

**Table 1. Quality control summary of the amplicon sequencing experiments**

| Cohort                              | French     | French     | CHDI       |
|-------------------------------------|------------|------------|------------|
| Total no. of samples                | 396        | 396        | 960        |
| Amplicon                            | amplicon-1 | amplicon-2 | amplicon-3 |
| Amplicon length (bp)                | 5,910      | 8,854      | 10,365     |
| No. of pooled samples per flow cell | 100        | 100        | 480        |
| QC-passed samples                   | 370        | 355        | 708        |
| Pass rate (%)                       | 93         | 90         | 74%        |

GRCh38 with more than 80% identical bases (Figure 2H). For example, BC71 is 24 bp and can be aligned to chr18:46568247-46568269 (GRCh38) with 22 bp matched. To avoid potential non-specific binding in the PCR reaction, we designed our own barcodes. As shown in Figure 2I, none of our custom barcodes has more than 80% identical bases in the human reference genome GRCh38.

#### QC summary of the amplicon sequencing experiments

In total, 318 samples from the French HD consortium and 664 samples from the CHDI Foundation passed QC and had sufficient sequencing data to make reliable variant calls. To ensure accurate SNP detection, we require a stringent QC criterion: at least 50× coverage for each allele. The QC summary of the amplicon sequencing experiments is shown in Table 1. The French cohort was amplified twice with different primers. Amplicon-1 (5.9 kb) mainly covers the upstream region of exon-1 while amplicon-2 (8.8 kb) mainly covers the downstream region. The two regions have some overlap and both cover the CAG repeat region. Therefore, a full-length haplotype can be assembled from phased SNPs of the two amplicons. For amplicon-1, 93% (370/396) of the samples passed QC while 90% (355/396) of the samples passed QC for amplicon-2. Eighty-eight percent (348/396) of samples passed QC for both amplicons and were used to assemble the full-length haplotype.

The CHDI cohort was amplified using the forward primer of amplicon-1 and backward primer of amplicon-2. This amplicon is referred to as amplicon-3 (10.3 kb; Figure 1F). A total of 74% (708/960) samples passed QC. This rate is lower than that of the French cohort, probably due to (1) the length of amplicon-3 is longer than amplicon-1 and amplicon-2, thus amplicon-3 is more difficult to amplify and requires higher DNA integrity; (2) some samples are of low concentration. Therefore, we used the French cohort as the main cohort for analysis and validate our conclusions on the CHDI cohort.

#### CAG and CCG repeat sizes detected from HD samples

The distribution of CAG repeat size is shown in Figure 3A (French cohort) and Figure S2 (CHDI cohort). Alleles with ≤35 CAG repeat units are denoted as normal alleles,

and those with ≥36 CAG repeat units denoted as expanded alleles. Most normal alleles are less than 26 repeats; repeat sizes between 27 and 35 were rare, consistent with previous studies.<sup>24</sup> CCG repeat size distribution were different among normal and *mHTT* chromosomes (Figure 3B). For normal, there were two predominant alleles: (CCG)<sub>7</sub> and (CCG)<sub>10</sub>. In *mHTT* chromosomes, (CCG)<sub>7</sub> predominates (~92%).

Since there was often a large difference (>20) in CAG repeat size between the normal and *mHTT* chromosomes, it was easy to separate the reads derived from normal and *mHTT* alleles for most samples (Figure 3C). One sample had CAG repeat sizes of 34 (intermediate) and 43 (expanded), which is the smallest CAG repeat size difference in the French HD cohort; both alleles have the same CCG repeat size. With the Gaussian mixture models, we were able to compute the probabilities and remove the reads that were not confidently classified so that the two alleles were well separated (Figures 3D and 3E).

#### SNPs with high allele frequency in HD samples

After the reads were phased according to the CAG and CCG repeats, SNP detection was performed for each allele (see material and methods section), generating a list of haplotyped SNPs of 10.3 kb. The complete list of the SNPs is shown in Tables S4, S13, and S14. A total of 110 SNPs were identified from the two HD cohorts; 56 SNPs are in the upstream HTT gene region; one SNPs is in 5' UTR; 7 SNPs are in the exon-1 coding region, and 46 SNPs are in intron-1. Eight SNPs are novel and have not been found in dbSNP, the Genome Aggregation Database (gnomAD), or the 1000 Genomes Project.<sup>38</sup> We validated the eight novel SNPs by examining the alignments using the Integrative Genomics Viewer (IGV<sup>39</sup>), we acknowledge that such novel SNPs could be still due to errors in long-range PCR and subsequent sequencing. The IGV screenshots are displayed in Figures S5–S12.

We first analyzed the SNPs identified from the French cohort. Among those identified, 19 are common with allele frequencies (AFs) of ≥5% in the normal or *mHTT* chromosomes, or the gnomAD database (non-Finnish European [NFE] population). The positions of the 19 SNPs are shown in Figure 4A. Notably, their AFs in normal and *mHTT* chromosomes are dramatically different (Figure 4B; Table 2). To verify SNP detection, the AFs of all identified SNPs were compared with their AFs in the gnomAD database. The AFs of SNPs in the normal chromosomes are highly correlated ( $R^2 = 0.9725$ ) with their AFs in NFE population in the gnomAD database. However, the correlation between the AFs of SNPs in the *mHTT* chromosomes and those in the gnomAD database are low ( $R^2 = 0.3936$ ) (Figures 4C and 4D). This indicates unique haplotypes for *mHTT* chromosomes, which is consistent with previous findings that CAG expansion events are associated with specific haplogroups.<sup>24</sup> Examination of the AFs of SNPs identified from the CHDI cohort validated our findings (Figure S3).



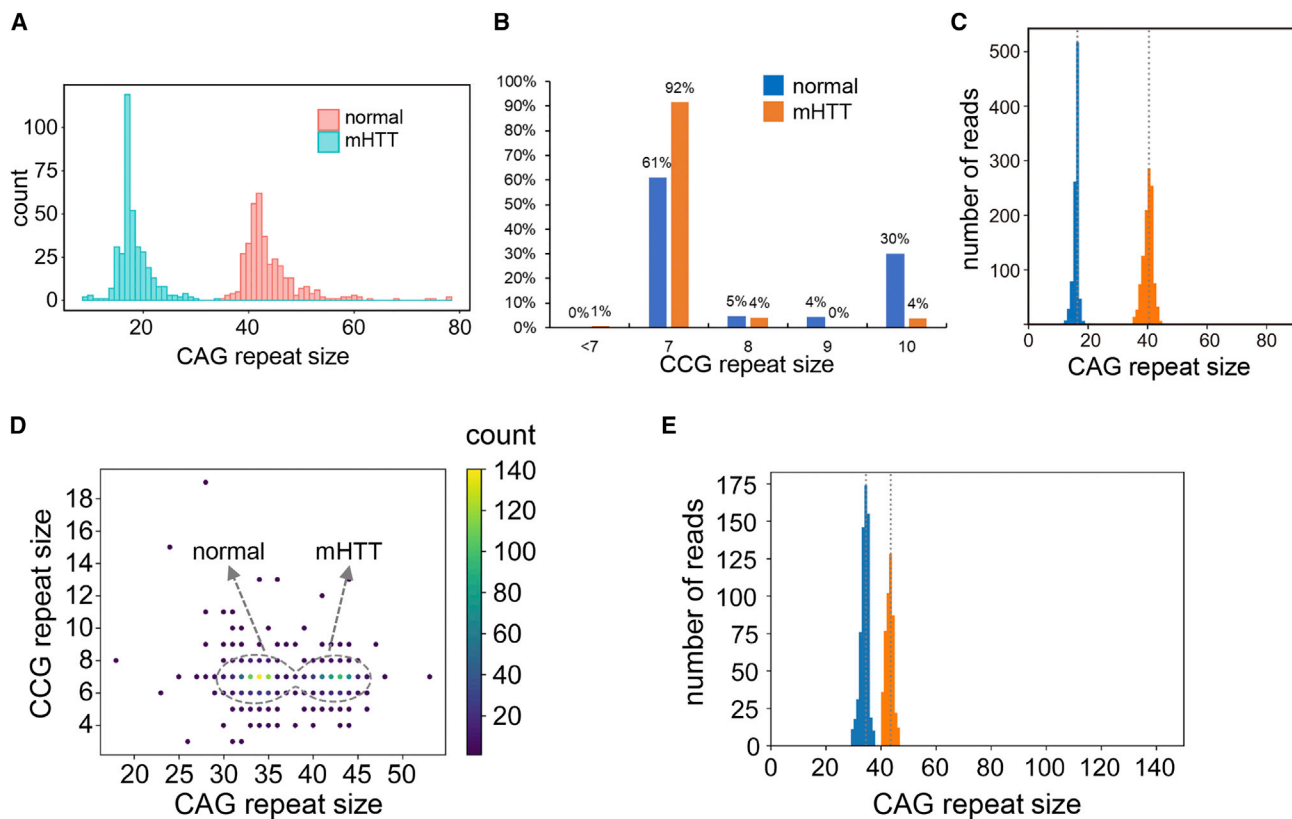

**Figure 3. CAG and CCG repeats detected from HD samples**

(A) Distribution of CAG repeat size of the French cohort. (B) The normal and mHTT allele showed distinct distribution in CCG repeat sizes. (C) CAG repeat size distribution of a typical HD sample. The reads derived from the normal allele (blue) and the *mHTT* allele (orange) are well separated. The estimated repeat sizes are marked by vertical gray lines. (D) Scatterplot of a sample with a disease-causing allele (CAG repeat size = 43) and an intermediate allele (CAG repeat size = 34). The dashed gray circle is an equi-probability surface of the fitted Gaussian models where the probability outside the surface is less than 5%. (E) Distribution of CAG repeat size of the same sample shown in (D). Reads that are not confidently classified are removed. The two alleles are well separated (blue, normal allele; orange, *mHTT* allele). The estimated repeat sizes are marked by vertical gray lines.

### Identification of SNPs for allele-specific genome editing

We analyzed the gain and loss of PAMs mediated by the 19 common SNPs as they comprise the majority of diversity in HD individuals and the general population, yielding putative targets for allele-specific genome editing. In addition to the canonical PAMs (NGG and NAG) recognized by SpCas9, we analyzed PAMs for five other native or engineered CRISPR enzymes, namely SaCas9, SpCas9\_VQR, SpCas9\_EQR, SpCas9\_VRER, and AsCpf1. SaCas9 is a Cas9 ortholog from *Staphylococcus aureus*.<sup>40</sup> SpCas9\_VQR, SpCas9\_EQR and SpCas9\_VRER are engineered SpCas9 variants from *Streptococcus pyogenes*. AsCpf1 is a class 2 CRISPR enzyme from *Acidaminococcus*, which is highly specific for the AT-rich motif (TTTN). Only highly effective PAMs recognized by these enzymes were analyzed (Table S5). An SNP can mediate the loss, gain, or loss/gain of PAMs and may induce or destroy PAMs for multiple enzymes. Two types of SNPs can mediate the deletion of the *mHTT*: (1) SNPs causing loss of a PAM in the normal chromosome; and (2) SNPs causing gain of a PAM in the *mHTT* chromosome. The effect of the 19 SNPs on different PAMs, and their AF, is shown in Table 2.

Among them, SNPs 1–6 are identical to the six SNPs previously identified and tested.<sup>20</sup> All have much higher AFs in the normal chromosomes than in the *mHTT* chromosomes (Table 2; Figure 4B). For example, the AF of SNP1 in the normal chromosomes is 23.51%, which is 8.3 times of the AF in the *mHTT* chromosomes (2.82%). All six SNPs cause PAM loss. Thus, the bias in AF (higher abundances on the normal chromosomes) allows HD individuals to benefit from this genome editing strategy. This is consistent with our previous observations that SNP1 mediated deletion of the expanded HTT in 9 of 11 cell lines (see Table S4 of Monteys et al.<sup>20</sup>).

Sixteen of the 19 SNPs cause the loss or gain of at least one PAM. In addition to SNPs1-6, SNP16 and SNP17 mediate PAM loss in the normal allele, with an AF > 30% in the normal chromosomes. The AFs of SNP16 in normal and *mHTT* chromosomes are 36.99% and 11.6%, respectively. The alternative allele of SNP16 disrupts the PAM of SpCas9\_VQR and SpCas9\_EQR (ref: C[G]AG; alt: C[A]AG). Both SpCas9\_VQR and SpCas9\_EQR recognize the PAM of NGAG, but SpCas9\_VQR also recognizes the motif of NAAG, at lower efficiency.<sup>31</sup> SNP16 can also be targeted

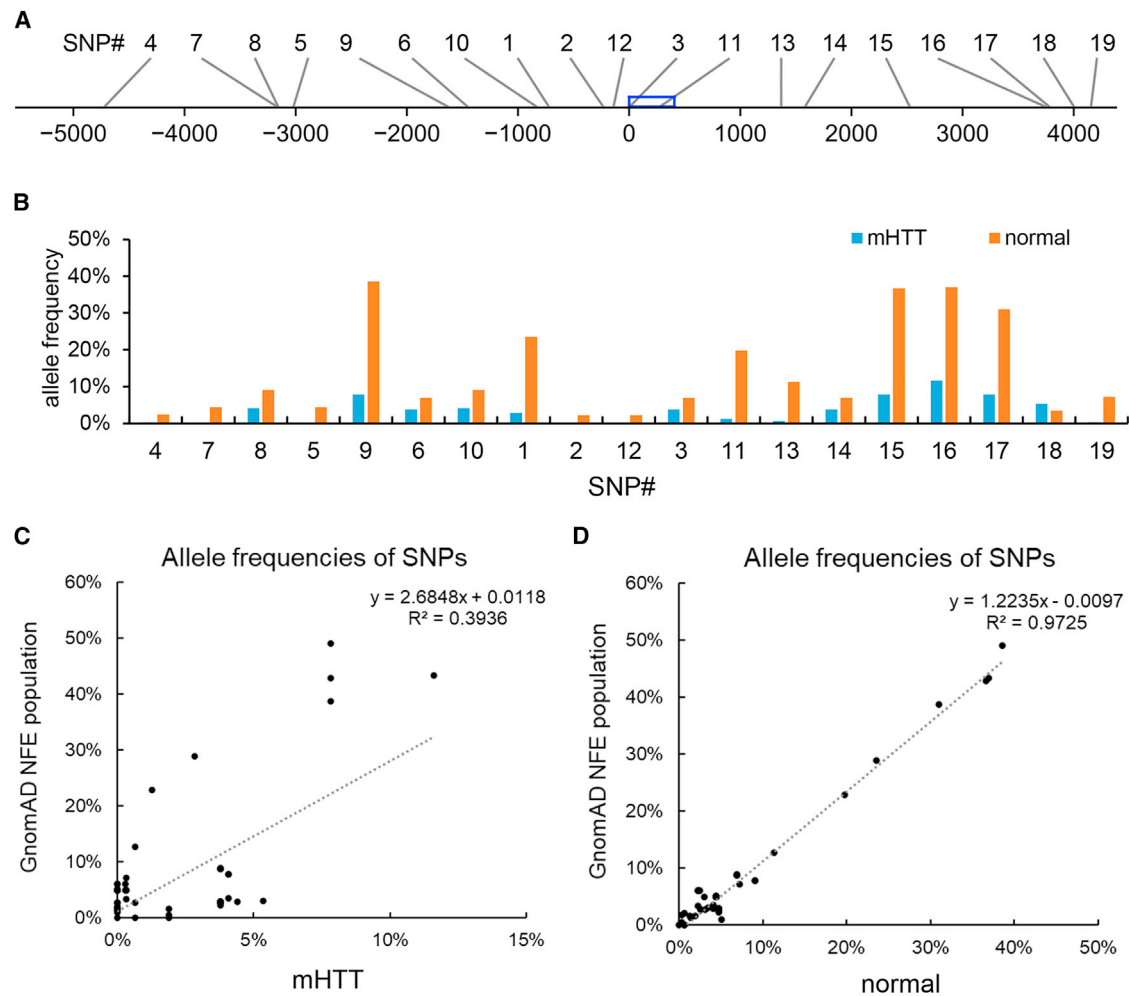

**Figure 4. SNPs detected from the HD samples**

(A) Positions of 19 common SNPs (relative to the first base of the *HTT* exon-1). The blue box indicates the position of exon-1. (B) AFs of 19 common SNPs identified in the HD cohort. The details of the SNPs are shown in [Table 2](#). (C) Scatterplot showing the AFs of SNPs in HD *mHTT* alleles and the gnomAD database (NFE population). (D) Scatterplot showing the AFs of SNPs in normal alleles and the gnomAD database (NFE population). (B–D) are based on the data of the French HD cohort.

by SaCas9 (ref: TC[G]AGT; alt: TC[A]AGT). SNP17 resides in a ploy-T region and exists in 31.03% of normal chromosomes assessed, and in 7.84% of *mHTT* chromosomes. SNP17 disrupts the PAM of AsCpf1 (ref: TT[T]T; alt: TT[C]T), which has a strong selectivity for the TTTN PAMs and thus SNP17 is AsCpf1 specific.

The specificity of the guide RNA sequence is critical for preventing off-target cleavage events. For the Cas9 enzyme and its variants, the guide sequence is on the 5' side of the PAM. But for the Cpf1 enzymes, the guide sequence is on the 3' side of the PAM. We used the Benchling website to design guide RNAs and predict their specificity. The guide RNA sequence for SNP16 is very specific with an off-target score of 98.4 (score ranging between 0 and 100, the higher the better). The guide RNA sequence (TAAAAAATAAAAAATAAGTTAACAC) for SNP17 is not specific, with an off-target score of 43.3. This sequence contains a poly(A) and may have multiple copies in the human genome. Therefore, SNP16 is a strong candidate with high AF and specificity.

We validated SNP16 genotyping from long reads using two traditional methods. First, we designed Sanger sequencing primers for SNP16 and randomly sequenced 20 samples from plate-1 of the French cohort. The Sanger sequencing results were completely consistent with the SNP genotypes called from the nanopore long reads. We also used TaqMan real-time PCR assay to genotype three 96-well plates (288 samples) of the CHDI cohort. The TaqMan assay results were also completely consistent with the SNPs called from the nanopore long reads. This indicates that our SNP calls made from the nanopore long reads are of high accuracy.

#### Experimental validation of the allele-specific cleavage mediated by SNP16

Our screen identified SNP16 (rs3856973) as a novel prevalent SNP within *HTT* intron-1, which could be used alone or together with SNP1 (rs2857935) to edit and terminate *mHTT* expression. We designed sgRNA sequences targeting

**Table 2. Common SNPs identified in the HD cohort**

| SNP ID | Position in Chr4 | Accession no. | Ref allele | Alt allele | AF expanded (%) | AF normal (%) | AF gnomAD (NFE) (%) | Enzyme      | Ref motif | Alt motif | Effect on PAM (gain/loss) | Strand   |
|--------|------------------|---------------|------------|------------|-----------------|---------------|---------------------|-------------|-----------|-----------|---------------------------|----------|
| SNP4   | 3069952          | rs35631490    | C          | G          | 0.3             | 2.6           | 6.0                 | SpCas9      | TG[G]     | TG[C]     | loss                      | negative |
| SNP7   | 3071526          | rs77384845    | C          | T          | 0.0             | 3.7           | 5.1                 | SpCas9 VQR  | T[G]AC    | T[A]AC    | loss                      | negative |
| SNP8   | 3071527          | rs10011412    | A          | G          | 4.3             | 7.5           | 7.8                 | —           | —         | —         | —                         | —        |
| SNP5   | 3071658          | rs61792464    | G          | C          | 0.3             | 3.7           | 5.1                 | SpCas9      | GG[C]     | GG[G]     | gain                      | negative |
|        |                  |               |            |            |                 |               |                     | SpCas9      | AA[G]     | AA[C]     | loss                      | positive |
| SNP9   | 3073068          | rs762855      | A          | G          | 6.3             | 32.5          | 49.0                | —           | —         | —         | —                         | —        |
| SNP6   | 3073238          | rs9996199     | C          | G          | 4.3             | 6.9           | 8.8                 | SpCas9      | TA[C]     | TA[G]     | gain                      | positive |
|        |                  |               |            |            |                 |               |                     | SpCas9      | CA[G]     | CA[C]     | loss                      | negative |
|        |                  |               |            |            |                 |               |                     | SpCas9 VQR  | A[C]TG    | A[G]TG    | gain                      | positive |
| SNP10  | 3073861          | rs28431418    | T          | C          | 4.6             | 8.1           | 7.9                 | Sau Cas9    | GTGAG[T]  | GTGAG[C]  | loss                      | positive |
| SNP1   | 3073964          | rs2857935     | G          | C          | 2.6             | 22.7          | 29.0                | SpCas9      | GG[G]     | GG[C]     | loss                      | positive |
|        |                  |               |            |            |                 |               |                     | SpCas9 VQR  | GGG[G]    | GGG[C]    | loss                      | positive |
|        |                  |               |            |            |                 |               |                     | SpCas9 VQR  | G[G]AT    | G[C]AT    | loss                      | positive |
|        |                  |               |            |            |                 |               |                     | Sau Cas9    | GGG[G]AT  | GGG[C]AT  | loss                      | positive |
| SNP2   | 3074454          | rs13122415    | C          | G          | 0.3             | 2.6           | 6.0                 | SpCas9      | AG[G]     | AG[C]     | loss                      | negative |
|        |                  |               |            |            |                 |               |                     | SpCas9      | G[G]G     | G[C]G     | loss                      | negative |
|        |                  |               |            |            |                 |               |                     | SpCas9 VQR  | G[G]GG    | G[C]GG    | loss                      | negative |
| SNP11  | 3074945          | rs76533208    | A          | G          | 1.7             | 24.4          | 22.8                | SpCas9 VRER | GG[T]G    | GG[C]G    | gain                      | negative |
| SNP12  | 3074539          | rs13132932    | A          | G          | 0.00            | 2.6           | 6.0                 | SpCas9 VQR  | GGC[A]    | GGC[G]    | gain                      | positive |
|        |                  |               |            |            |                 |               |                     | SpCas9 VRER | GGC[A]    | GGC[G]    | gain                      | positive |
|        |                  |               |            |            |                 |               |                     | SpCas9 VQR  | C[A]GG    | C[G]GG    | gain                      | positive |
| SNP3   | 3074678          | rs13102260    | G          | A          | 4.3             | 6.90          | 9.0                 | SpCas9      | TG[G]     | TG[A]     | loss                      | positive |
|        |                  |               |            |            |                 |               |                     | SpCas9 VQR  | G[G]GG    | G[A]GG    | loss                      | positive |
|        |                  |               |            |            |                 |               |                     | SpCas9 EQR  | TG[G]G    | TG[A]G    | gain                      | positive |
| SNP13  | 3076049          | rs73191179    | G          | A          | 0.9             | 10.9          | 12.7                | SpCas9 VQR  | C[G]GG    | C[A]GG    | loss                      | positive |
| SNP14  | 3076258          | rs28656215    | T          | C          | 4.3             | 6.90          | 8.8                 | —           | —         | —         | —                         | —        |
| SNP15  | 3077210          | rs3905238     | A          | G          | 8.1             | 35.3          | 42.9                | SpCas9 VQR  | TGC[A]    | TGC[G]    | gain                      | positive |
|        |                  |               |            |            |                 |               |                     | SpCas9 EQR  | TGC[A]    | TGC[G]    | gain                      | positive |

(Continued on next page)

**Table 2. Continued**

| SNP ID | Position in Chr4 | Accession no. | Ref allele | Alt allele | AF expanded (%) | AF normal (%) | AF gnomAD (NFE) (%) | Enzyme      | Ref motif | Alt motif | Effect on PAM (gain/loss) | Strand   |
|--------|------------------|---------------|------------|------------|-----------------|---------------|---------------------|-------------|-----------|-----------|---------------------------|----------|
| SNP16  | 3078446          | rs3856973     | G          | A          | 12.1            | 35.1          | 43.3                | SpCas9 VQR  | C[G]AG    | C[A]AG    | loss                      | positive |
|        |                  |               |            |            |                 |               |                     | SpCas9 EQR  | C[G]AG    | C[A]AG    | loss                      | positive |
|        |                  |               |            |            |                 |               |                     | Sau Cas9    | TC[G]AGT  | TC[A]AGT  | loss                      | positive |
| SNP17  | 3078472          | rs4498089     | A          | G          | 8.1             | 29.6          | 38.7                | SpCas9      | AA[A]     | AA[G]     | gain                      | positive |
|        |                  |               |            |            |                 |               |                     | SpCas9 VQR  | A[A]AA    | A[G]AA    | gain                      | positive |
|        |                  |               |            |            |                 |               |                     | AsCpf1      | TT[TT]    | TT[C]T    | loss                      | negative |
| SNP18  | 3078688          | rs148125464   | C          | T          | 5.2             | 2.9           | 3.1                 | SpCas9      | AG[G]     | AG[A]     | loss                      | negative |
|        |                  |               |            |            |                 |               |                     | SpCas9 VQR  | AG[G]C    | AG[A]C    | gain                      | negative |
| SNP19  | 3078835          | rs57666989    | C          | T          | 0.9             | 7.8           | 7.2                 | SpCas9 VQR  | GGC[G]    | GGC[A]    | loss                      | negative |
|        |                  |               |            |            |                 |               |                     | SpCas9 VRER | GGC[G]    | GGC[A]    | loss                      | negative |
|        |                  |               |            |            |                 |               |                     | SpCas9 VQR  | C[G]TG    | C[A]TG    | loss                      | negative |

Allele frequencies and effect on PAM are listed.

SNP16 (sgHD16) and SNP1 (sgHD1) to mediate SaCas9 editing of the *mHTT* exon-1. The sgHDi3 (targeting intron-1) and sgCtl guides used in our previous study<sup>20</sup> were modified to complex with SaCas9. We tested the editing efficacy of three pairs: sgHD1/16 (targeting SNP1 and SNP16), sgHD1/i3 (previously tested, positive control), and sgCtl (negative control) (Figure 5A). HEK293 cells, which are homozygous for both SNP1 and SNP16, were transfected with sgRNA/SaCas9 expression plasmids and genomic deletions were assessed. DNA products of the anticipated size were amplified in all sgRNA/SaCas9 pairs tested. The *HTT* genomic locus remained intact on cells co-expressing SaCas9 and sgCtl (negative control group), whereas a band resulting from *HTT* exon-1 deletion was observed on cells transfected with the sgHD1/i3 SaCas9 or the sgHD1/16 SaCas9 cassettes (Figure 5B). Notably, the intensity of the amplified DNA bands indicates that the editing efficacy of sgHD1/i3 was higher than the sgHD1/16 pair. *HTT* mRNA levels were reduced in cells following editing, as determined by qPCR (Figure 5C). Reduction of *HTT* mRNA levels was greater in cells expressing sgHD1/i3 than the sgHD1/16 pairs, mirroring what was observed by PCR of genomic DNA.

Next, we tested if the sgHD1/16 pair can be used for expanded allele-specific targeting. The ND33392 fibroblast line contains heterozygous SNP1 and SNP16 with the SNP-dependent PAMs on the *mHTT* allele (Figure 5D). PCR amplification of genomic DNA using primer pairs binding within the *mHTT* exon-1 sequence showed targeted cleavage of the *mHTT* allele in cells electroporated with plasmids expressing sgHD1/i3/SaCas9 and sgHD1/16/SaCas9 relative to those electroporated with the control sgCtl/SaCas9 complex (Figures 5E and 5F).

### Analysis of haplotypes of the HD samples

To better understand the percentage of HD individuals who could benefit from our editing approach, the haplotypes of normal and *mHTT* chromosomes of the HD individuals as well as those in the 1000 Genomes Project phase 3 dataset (denoted as 1KG dataset hereafter) were analyzed. The 1KG dataset provides phased SNP/indel calls of 2,504 individuals, of whom 404 individuals are from the NFE population. In the following haplotype analysis, we used all SNPs listed in Table 2 except SNP11, as it resides in the CAG-CCG repeat region and was not genotyped in the 1KG dataset.

In total, we observed 37 different haplotypes in the French HD cohort (including normal and *mHTT* chromosomes) and individuals of NFE population in the phase 3 dataset. The SNPs carried by each haplotype are shown in Table S6. The frequencies of the top 10 most abundant haplotypes are shown in Figure 6A. Hap1 (no SNP across the region) is the predominant haplotype (82.58%) in the *mHTT* chromosomes. It is also the most abundant haplotype in normal chromosomes (frequency = 48.39%). The frequencies of minor haplotypes (haplotypes 2–37) are dramatically different between normal and

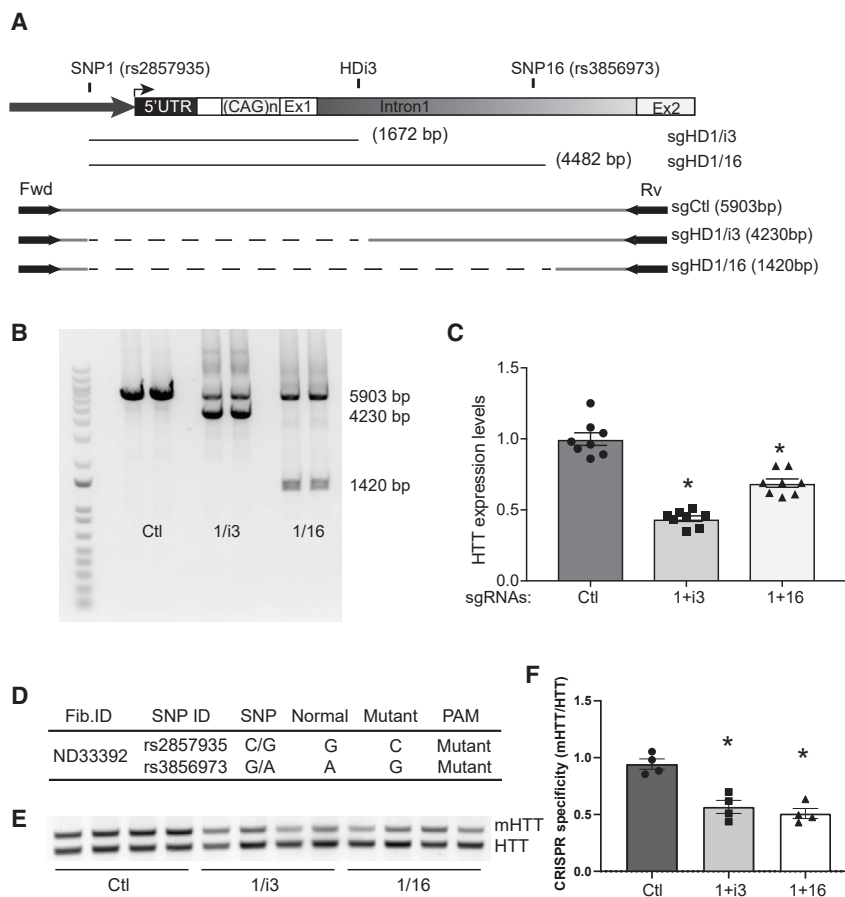

**Figure 5. Allele-specific cleavage mediated by SNP1 and SNP16**

(A) Cartoon depicting the relative position of SNP1- and SNP16-dependent PAMs flanking *HTT* exon-1 and one common PAM within *HTT* intron-1 (HDi3). PCR primer positions and estimated sizes of the targeted deleted sequences are indicated. 1, i3, and 16 are sgRNAs targeting PAMs at SNP1, HDi3, and SNP16, respectively.

(B) A genomic PCR showing *HTT* exon-1-targeted deletion mediated by SNP1- and SNP16-dependent PAMs.

(C) qRT-PCR analysis of *HTT* mRNA levels in HEK293 cells transfected with CRISPR enzymes targeting SNP1 and SNP16 (n = 8).

(E) The haplotype of the ND33392 fibroblast cell line and the corresponding PAMs.

(F) A semiquantitative PCR reaction showing the reduction of the *mHTT* allele in a fibroblast cell line (ND33392) transfected with SaCas9 targeting SNP1 and SNP16.

(C) and (F) The results are mean  $\pm$  SEM relative to the control group. \*p < 0.05, one-way ANOVA followed by Bonferroni's post-hoc.

*mHTT* chromosomes. The frequencies of the minor haplotypes in the normal chromosomes are highly correlated ( $R^2 = 0.8036$ ) with those in the 1KG dataset. In contrast, the haplotype frequencies in the *mHTT* chromosomes have no correlation ( $R^2 = 0.0031$ ) with those in the 1KG dataset (Figures 6C and 6D). To validate these discoveries, we examined the haplotypes of the CHDI cohort, which contains HD samples from multiple continents and ethnicities. Similar to the French cohort, Hap1 is the predominant haplotype (>80%) of the *mHTT* chromosomes, in samples from all continents and ethnic groups with more than 50 samples (Figures 6E and 6F). We also tested if there is an association between the expanded CAG repeats and haplotypes. The median CAG repeat size is between 45 and 48 in all groups (Figure 6B). We did not find a haplotype that is associated with specific repeat sizes.

Since the haplotypes of all HD individuals have been identified, we could estimate the percentage of people potentially amenable to our allele-specific genome editing strategy (Figure 6I); 22% of the HD individuals can be edited at SNP1 and 30.2% of the HD individuals can be edited at SNP16. The fraction of HD subjects who have SNP16 on both mutant and normal *HTT*, mutant *HTT* only, normal *HTT* only, and none are 4.9%, 7.2%, 30.2%, and 57.8%, respectively. A combination of SNPs1-6 and SNP16 can

potentially edit 41% HD individuals. Up to 57% HD individuals can be edited if all SNPs are targeted. However, 43% HD individuals cannot be edited as 91% of them carry homozygous hap1 and there is no heterozygous

### Searching for potential editing sites for individuals with hap1 in both alleles

SNP in the region covered by our sequencing data (5,073 bp upstream and 4,884 bp downstream of exon-1). We tried additional strategies to find potential editing sites for individuals with hap1 in both alleles. First, we called indels and structural variants (SVs) from our sequencing data. However, all common Indels/SVs are located in tandem repeat regions where the guide RNAs are not specific. Next, we analyzed SNPs within a greater range than our earlier 10-kb limit using the 1KG dataset (NFE population). Since the 1KG dataset provides phased SNPs, we can extract the SNPs from chromosome 4 with different haplotypes. We found that, in hap1 chromosomes, there are fewer SNPs in the *HTT* gene (167 kb) compared with the intergenic region. (Figure S4). In regions upstream of the *HTT* gene, the nearest high-frequency SNP (AF > 20%) in hap1 chromosomes is 12.4 kb away from exon-1 (Table S7), which is outside of the range useful for efficient editing. In the region downstream of exon-1, the closest high-frequency SNP is 20.7 kb away (Table S8), similarly of limited utility for deleting exon-1. However, this SNP resides close to exon-3 and could be a candidate site to delete exon-3. We also found several high-frequency SNPs close to exon-6, exon-17, exon-23, and others. The *HTT* gene is a

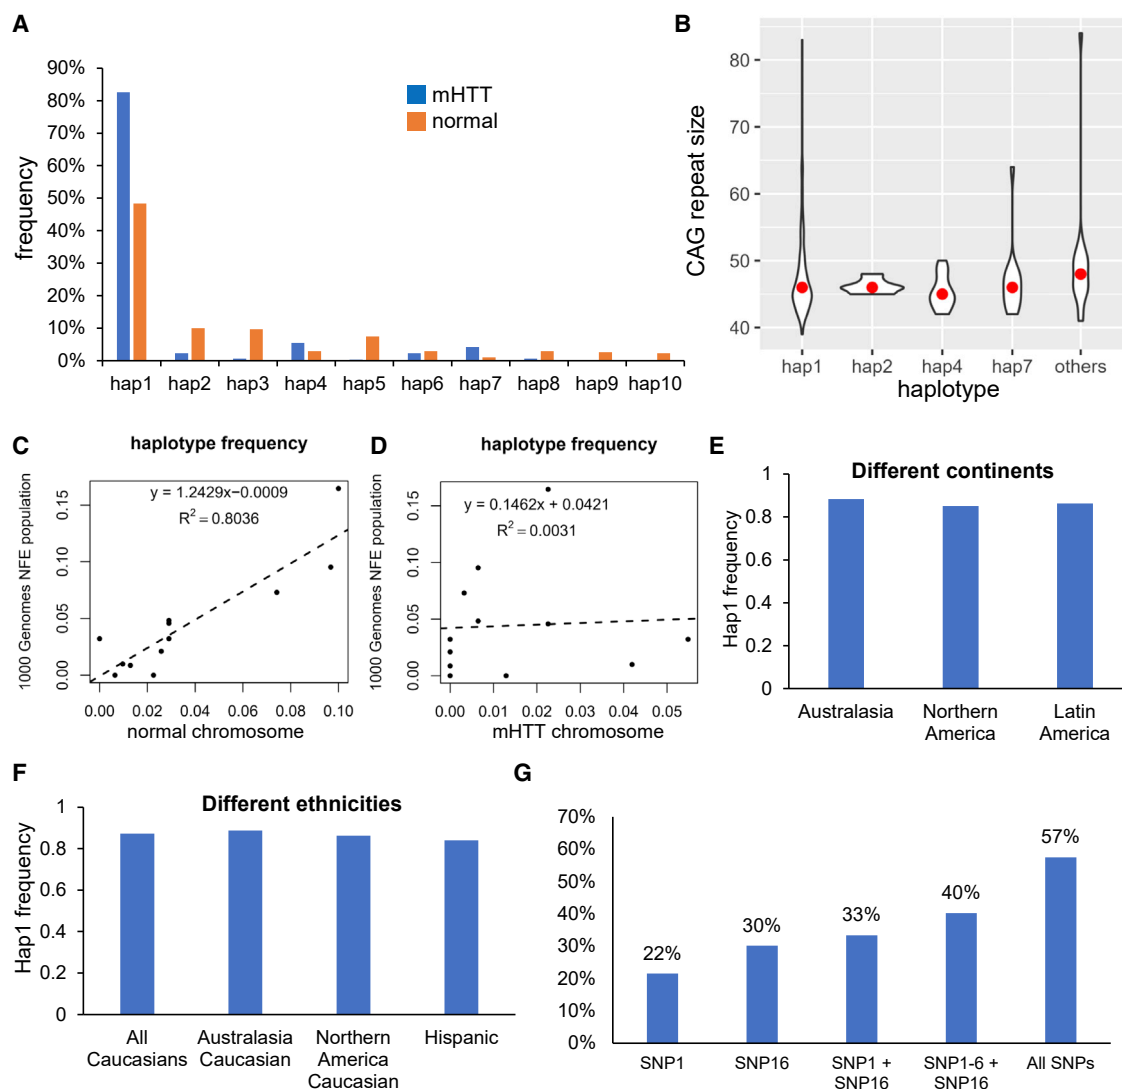

**Figure 6. Haplotype analysis of HD individuals**

(A) Frequencies of top 10 haplotypes of HD samples.

(B) Violin plot showing the distribution of repeat sizes in different haplotypes of the *mHTT* chromosomes. The red dots indicate the median of the repeat size.

(C) Scatterplot showing haplotype frequencies of the normal chromosomes and 1000 Genomes individuals (phase 3, non-Finnish European population).

(D) Scatterplot showing haplotype frequencies of the *mHTT* chromosomes and 1000 Genomes individuals (phase 3, non-Finnish European population).

(E and F) Frequencies of Hap1 in *mHTT* chromosomes in HD samples from different continents and ethnicities.

(G) Percentage of HD individuals who can be edited, based on the haplotype analysis.

large gene with 67 exons. Theoretically, deletion of exon-3/exon-6/exon-23 would shift the reading frame and cause a premature stop codon disrupting huntingtin protein expression. However, if expanded exon-1 is left intact, alternative splicing events or RAN translation could still occur.<sup>41–43</sup>

## Discussion

In this study, we developed a targeted long-read sequencing approach to resolve a 10.4-kb genomic region

flanking the CAG repeats in exon-1 of the *HTT* gene and applied this approach to two independent HD cohorts for the purpose of allele-specific editing for HD therapeutic development. We called genomic variants from the sequencing data and systematically analyzed potential gene-editing sites that could mediate allele-specific deletions of the *mHTT* allele. Our results showed that 22% of HD individuals can be edited by targeting SNP1, to which the guide RNA had been developed and tested earlier.<sup>20</sup> In addition, we identified SNP16 as a novel candidate, which can target more people (30%) than SNP1 does in HD individuals of European ancestry. In proof-of-concept

experiments, gRNAs targeting SNP16 could effectively edit *mHTT* cell lines. Overall, our haplotype analysis reveals that up to 57% HD individuals of European ancestry can be potentially targeted in an allele-specific manner by combinatorial editing.

Hap1 is the predominant haplotype in both normal chromosomes (48.39%) and *mHTT* chromosomes (82.58%). Due to the lack of diversity in the haplotypes, about 40% of HD individuals carry hap1 in both alleles and cannot be edited by targeting an SNP near exon-1. Unfortunately, further analyses using other strategies did not find high-frequency Indels or SVs that could mediate allele-specific editing; the nearest high-frequency SNP was at least 10 kb away. Despite this, deletion of other exons in an allele-specific manner is possible. Their deletion could induce an open reading frameshift causing a premature stop codon and loss of *mHTT* expression. However, toxicity from exon-1-derived transcripts would remain.<sup>41–43</sup>

Earlier work also analyzed SNPs and HD haplotypes.<sup>23,44,45</sup> For this, SNP arrays were used to genotype common SNPs and focused on target sites for allele-specific knockdown by ASOs or RNAi. Thus the haplotypes were based on the *HTT* gene, most of which are distant from exon-1. Here, we used long-read sequencing. This has the advantage over SNP array genotyping and short-read sequencing in that it can perform repeat quantification, SNP detection, and haplotyping at the same time. With long reads, the haplotyping process is straightforward and does not require trio data. We were able to assemble the diploid genome sequence for each HD individual. However, we want to stress that, while the genetic details that we observe provide some potentially interesting genetic insights into how the various haplotypes might have arisen, we do not have evidence that this specific haplotype is responsible for the *HTT* expansion observed; instead, it is quite likely that the expansion arose on a specific haplotype, which is then overrepresented in the HD population across the continent. Cumulatively, our data provide a comprehensive analysis of allele-specific target sites for CRISPR-based gene editing, which relies on the ability of an SNP to provide a PAM site for targeted editing of the expanded allele. For effective editing, we focused on genomic regions within 5 kb of exon-1, because previous work showed that the distance between upstream and downstream guides influenced editing efficacy.<sup>20</sup>

Long reads have a higher per-base error rate than short reads. However, the sequencing error tends to be random and the consensus sequence of high-coverage long reads can be very accurate.<sup>46</sup> We required at least 50× coverage per allele for analysis, and the vast majority of samples have more than 200× coverage per allele. In our results, the AFs of the SNPs in normal chromosomes are highly correlated with those in the gnomAD database, indicating that the SNP detection is correct. The haplotype frequencies in normal chromosomes are also highly correlated with those in the 1KG dataset. In addition, we validated the genotypes of SNP16 using Sanger sequencing

and a TaqMan SNP genotyping assay, both of which generated results identical to the ONT long reads. Of note, ONT sequencing produces more Indel errors in homopolymer regions (e.g., the poly(A) sequence). Therefore, indel detection from ONT reads may be less accurate in homopolymer regions. As our study focuses on SNP detection, our data are less affected by this limitation.

NanoBinner and NanoRepeat are novel computational tools developed for this work. NanoBinner is a demultiplexer for amplicon sequencing data. Existing tools, such as DeepBinner<sup>47</sup> and qcat, only support the barcoding kits provided by ONT. NanoBinner is a general tool and can work with any user-provided barcodes. NanoRepeat is a tool for repeat detection from amplicon sequencing. It uses alignment-based quantification and can jointly quantify two adjacent tandem repeats, phase the reads, and report haplotypes. We evaluated NanoRepeat on both whole-genome sequencing data and amplicon sequencing data of our HD cohort. In the whole-genome data, NanoRepeat outperformed other repeat quantification tools and reduced the average quantification error by 3.5-fold. In our amplicon sequencing data of the CHDI cohort, NanoRepeat is highly consistent with PCR-based fragment analysis, which is commonly used in clinical labs for diagnostic purposes.

sgRNAs targeting SNPs1-6 were validated previously.<sup>20</sup> In this study, we developed sgRNAs targeting SNP16 and tested it in cell lines. There was significant reduction of *HTT* levels in HEK293 cells and *mHTT* in ND33392 fibroblast cells. However, the efficacy of editing SNP1/16 (two SNPs) was not higher than editing SNP1/i3 (one SNP and one homozygous site), which may be due to the longer distance between the SNP1/16 sgRNA-Cas9 complexes and sequence context at SNP16. Nonetheless, SNP16 is a promising candidate because it creates a PAM more frequently than SNP1 and editing at SNP16 would benefit HD individuals without SNP1.

In summary, we developed an experimental and computational workflow to resolve the SNP haplotypes near exon-1 of the *HTT* gene for allele specific editing. We applied this workflow to two HD cohorts and comprehensively analyzed potential sites for allele-specific deletion of *mHTT* for CRISPR-Cas systems. We also generated a detailed haplotype map for the region near *HTT* exon-1, which may be applied to other editing strategies and newly emerging editing enzymes. In addition, our workflow and novel computational tools can be applied to other repeat expansion disorders.

#### Ethics statements

HD participants from the French cohort were recruited at the Pitié Salpêtrière Hospital in Paris, France. All participants gave written informed consent, and blood samples were collected in accordance with local French regulations (Paris Necker ethics committee approval [RBM 03–48] to A.D.). Genomic DNA samples from the CHDI cohort were generously provided by the participants in the

Enroll-HD study and made available by the CHDI Foundation.

### Data and code availability

Due to potential compromise of individual privacy, the raw sequencing data of the HD individuals generated during this study has not been deposited in a public repository but are available from the corresponding author on reasonable request and institutional data use agreement. The code generated during this study is available on GitHub: NanoBinner and NanoRepeat. A tutorial for statistical phasing based on tagging SNPs (using data released in this study).

### Supplemental information

Supplemental information can be found online at <https://doi.org/10.1016/j.xhgg.2022.100146>.

### Acknowledgments

We thank the participants and their family members for contributing samples for this research. Participants of the French cohort were recruited at the Pitié Salpêtrière Hospital in Paris, France. Samples for the CHDI cohort was generously provided by the participants in the Enroll-HD study and made available by the CHDI Foundation, a non-profit biomedical research organization exclusively dedicated to collaboratively developing therapeutics for HD. This study is in part supported by the NIH/NIGMS grant GM132713 (to KW.).

### Declaration of interests

P.G.-A. is currently employed by Spark Therapeutics.

Received: May 12, 2022

Accepted: September 23, 2022

### Web resources

Benchling research platform, <https://benchling.com>  
NanoBinner: <https://github.com/WGLab/NanoBinner>  
NanoRepeat: <https://github.com/WGLab/NanoRepeat>  
OMIM, <https://www.omim.org>  
GitHub repository, <https://github.com/nanoporetech/qcat>  
GitHub repository, <https://github.com/WGLab/HTT-SNP-Phasing>

### References

1. The Huntington's Disease Collaborative Research Group (1993). A novel gene containing a trinucleotide repeat that is expanded and unstable on Huntington's disease chromosomes. *Cell* 72, 971–983.
2. Bates, G.P., Dorsey, R., Gusella, J.F., Hayden, M.R., Kay, C., Leavitt, B.R., Nance, M., Ross, C.A., Scahill, R.I., Wetzel, R., et al. (2015). Huntington disease. *Nat. Rev. Dis. Primers* 1, 15005.
3. McColgan, P., and Tabrizi, S.J. (2018). Huntington's disease: a clinical review. *Eur. J. Neurol.* 25, 24–34.

4. Fisher, E.R., and Hayden, M.R. (2014). Multisource ascertainment of Huntington disease in Canada: prevalence and population at risk. *Mov. Disord.* 29, 105–114.
5. Roos, R.A. (2010). Huntington's disease: a clinical review. *Orphanet J. Rare Dis.* 5, 40.
6. Labbadia, J., and Morimoto, R.I. (2013). Huntington's disease: underlying molecular mechanisms and emerging concepts. *Trends Biochem. Sci.* 38, 378–385.
7. Lee, J.M., Ramos, E.M., Lee, J.H., Gillis, T., Mysore, J.S., Hayden, M.R., Warby, S.C., Morrison, P., Nance, M., Ross, C.A., et al. (2012). CAG repeat expansion in Huntington disease determines age at onset in a fully dominant fashion. *Neurology* 78, 690–695.
8. Yamamoto, A., Lucas, J.J., and Hen, R. (2000). Reversal of neuropathology and motor dysfunction in a conditional model of Huntington's disease. *Cell* 101, 57–66.
9. Harper, S.Q., Staber, P.D., He, X., Eliason, S.L., Martins, I.H., Mao, Q., Yang, L., Kotin, R.M., Paulson, H.L., and Davidson, B.L. (2005). RNA interference improves motor and neuropathological abnormalities in a Huntington's disease mouse model. *Proc. Natl. Acad. Sci. USA* 102, 5820–5825.
10. DiFiglia, M., Sena-Esteves, M., Chase, K., Sapp, E., Pfister, E., Sass, M., Yoder, J., Reeves, P., Pandey, R.K., Rajeev, K.G., et al. (2007). Therapeutic silencing of mutant huntingtin with siRNA attenuates striatal and cortical neuropathology and behavioral deficits. *Proc. Natl. Acad. Sci. USA* 104, 17204–17209.
11. Kordasiewicz, H.B., Stanek, L.M., Wancewicz, E.V., Mazur, C., McAlonis, M.M., Pytel, K.A., Artates, J.W., Weiss, A., Cheng, S.H., Shihabuddin, L.S., et al. (2012). Sustained therapeutic reversal of Huntington's disease by transient repression of huntingtin synthesis. *Neuron* 74, 1031–1044.
12. Tabrizi, S.J., Leavitt, B.R., Landwehrmeyer, G.B., Wild, E.J., Saft, C., Barker, R.A., Blair, N.F., Craufurd, D., Priller, J., Rickards, H., et al. (2019). Targeting huntingtin expression in patients with Huntington's disease. *N. Engl. J. Med.* 380, 2307–2316.
13. (2021). Roche provides update on tominersen programme in manifest Huntington's disease.
14. (2021). Wave Life Sciences provides update on phase 1b/2a PRECISION-HD trials.
15. Jinek, M., Chylinski, K., Fonfara, I., Hauer, M., Doudna, J.A., and Charpentier, E. (2012). A programmable dual-RNA-guided DNA endonuclease in adaptive bacterial immunity. *Science* 337, 816–821.
16. Cong, L., Ran, F.A., Cox, D., Lin, S., Barretto, R., Habib, N., Hsu, P.D., Wu, X., Jiang, W., Marraffini, L.A., et al. (2013). Multiplex genome engineering using CRISPR/Cas systems. *Science* 339, 819–823.
17. Mali, P., Yang, L., Esvelt, K.M., Aach, J., Guell, M., DiCarlo, J.E., Norville, J.E., and Church, G.M. (2013). RNA-guided human genome engineering via Cas9. *Science* 339, 823–826.
18. Anders, C., Niewoehner, O., Duerst, A., and Jinek, M. (2014). Structural basis of PAM-dependent target DNA recognition by the Cas9 endonuclease. *Nature* 513, 569–573.
19. Hsu, P.D., Scott, D.A., Weinstein, J.A., Ran, F.A., Konermann, S., Agarwala, V., Li, Y., Fine, E.J., Wu, X., Shalem, O., et al. (2013). DNA targeting specificity of RNA-guided Cas9 nucleases. *Nat. Biotechnol.* 31, 827–832.
20. Montey, A.M., Ebanks, S.A., Keiser, M.S., and Davidson, B.L. (2017). CRISPR/Cas9 editing of the mutant huntingtin allele in vitro and in vivo. *Mol. Ther.* 25, 12–23.



21. Eisenstein, M. (2018). CRISPR takes on Huntington's disease. *Nature* 557, S42–S43.
22. Shin, J.W., Kim, K.H., Chao, M.J., Atwal, R.S., Gillis, T., MacDonald, M.E., Gusella, J.F., and Lee, J.M. (2016). Permanent inactivation of Huntington's disease mutation by personalized allele-specific CRISPR/Cas9. *Hum. Mol. Genet.* 25, 4566–4576.
23. Kay, C., Collins, J.A., Caron, N.S., Agostinho, L.A., Findlay-Black, H., Casal, L., Sumathipala, D., Dissanayake, V.H.W., Cornejo-Olivas, M., Baine, F., et al. (2019). A comprehensive haplotype-targeting strategy for allele-specific HTT suppression in Huntington disease. *Am. J. Hum. Genet.* 105, 1112–1125.
24. Warby, S.C., Montpetit, A., Hayden, A.R., Carroll, J.B., Butland, S.L., Visscher, H., Collins, J.A., Semaka, A., Hudson, T.J., and Hayden, M.R. (2009). CAG expansion in the Huntington disease gene is associated with a specific and targetable predisposing haplogroup. *Am. J. Hum. Genet.* 84, 351–366.
25. Altschul, S.F., Gish, W., Miller, W., Myers, E.W., and Lipman, D.J. (1990). Basic local alignment search tool. *J. Mol. Biol.* 215, 403–410.
26. Camacho, C., Coulouris, G., Avagyan, V., Ma, N., Papadopoulos, J., Bealer, K., and Madden, T.L. (2009). BLAST+: architecture and applications. *BMC Bioinf.* 10, 421.
27. Li, H. (2018). Minimap2: pairwise alignment for nucleotide sequences. *Bioinformatics* 34, 3094–3100.
28. Li, H., Handsaker, B., Wysoker, A., Fennell, T., Ruan, J., Homer, N., Marth, G., Abecasis, G., Durbin, R., and Genome Project Data Processing, S. (2009). The sequence alignment/map format and SAMtools. *Bioinformatics* 25, 2078–2079.
29. Edge, P., and Bansal, V. (2019). Longshot enables accurate variant calling in diploid genomes from single-molecule long read sequencing. *Nat. Commun.* 10, 4660.
30. Koren, S., Walenz, B.P., Berlin, K., Miller, J.R., Bergman, N.H., and Phillippy, A.M. (2017). Canu: scalable and accurate long-read assembly via adaptive k-mer weighting and repeat separation. *Genome Res.* 27, 722–736.
31. Kleinstiver, B.P., Prew, M.S., Tsai, S.Q., Topkar, V.V., Nguyen, N.T., Zheng, Z., Gonzales, A.P., Li, Z., Peterson, R.T., Yeh, J.R., et al. (2015). Engineered CRISPR-Cas9 nucleases with altered PAM specificities. *Nature* 523, 481–485.
32. Andrew, S.E., Goldberg, Y.P., Theilmann, J., Zeisler, J., and Hayden, M.R. (1994). A CCG repeat polymorphism adjacent to the CAG repeat in the Huntington disease gene: implications for diagnostic accuracy and predictive testing. *Hum. Mol. Genet.* 3, 65–67.
33. Pramanik, S., Basu, P., Gangopadhaya, P.K., Sinha, K.K., Jha, D.K., Sinha, S., Das, S.K., Maity, B.K., Mukherjee, S.C., Roychoudhuri, S., et al. (2000). Analysis of CAG and CCG repeats in Huntingtin gene among HD patients and normal populations of India. *Eur. J. Hum. Genet.* 8, 678–682.
34. Agostinho Lde, A., Rocha, C.F., Medina-Acosta, E., Barboza, H.N., da Silva, A.F., Pereira, S.P., da Silva Idos, S., Paradela, E.R., Figueiredo, A.L., Nogueira Ede, M., et al. (2012). Haplotype analysis of the CAG and CCG repeats in 21 Brazilian families with Huntington's disease. *J. Hum. Genet.* 57, 796–803.
35. Nurk, S., Koren, S., Rhie, A., Rautiainen, M., Bizikadze, A.V., Mikheenko, A., Vollger, M.R., Altemose, N., Uralsky, L., Gershman, A., et al. (2022). The complete sequence of a human genome. *Science* 376, 44–53.
36. Liu, Q., Zhang, P., Wang, D., Gu, W., and Wang, K. (2017). Interrogating the "unsequenceable" genomic trinucleotide repeat disorders by long-read sequencing. *Genome Med.* 9, 65.
37. Giesselmann, P., Brandl, B., Raimondeau, E., Bowen, R., Rohrandt, C., Tandon, R., Kretzmer, H., Assum, G., Galonska, C., Siebert, R., et al. (2019). Analysis of short tandem repeat expansions and their methylation state with nanopore sequencing. *Nat. Biotechnol.* 37, 1478–1481.
38. Karczewski, K.J., Francioli, L.C., Tiao, G., Cummings, B.B., Alfoldi, J., Wang, Q., Collins, R.L., Laricchia, K.M., Ganna, A., Birnbaum, D.P., et al. (2020). The mutational constraint spectrum quantified from variation in 141,456 humans. *Nature* 581, 434–443.
39. Robinson, J.T., Thorvaldsdottir, H., Winckler, W., Guttman, M., Lander, E.S., Getz, G., and Mesirov, J.P. (2011). Integrative genomics viewer. *Nat. Biotechnol.* 29, 24–26.
40. Ran, F.A., Cong, L., Yan, W.X., Scott, D.A., Gootenberg, J.S., Kriz, A.J., Zetsche, B., Shalem, O., Wu, X., Makarova, K.S., et al. (2015). In vivo genome editing using Staphylococcus aureus Cas9. *Nature* 520, 186–191.
41. Sathasivam, K., Neueder, A., Gipson, T.A., Landles, C., Benjamin, A.C., Bondulich, M.K., Smith, D.L., Faull, R.L., Roos, R.A., Howland, D., et al. (2013). Aberrant splicing of HTT generates the pathogenic exon 1 protein in Huntington disease. *Proc. Natl. Acad. Sci. USA* 110, 2366–2370.
42. Banez-Coronel, M., Ayhan, F., Tarabochia, A.D., Zu, T., Perez, B.A., Tusi, S.K., Pletnikova, O., Borchelt, D.R., Ross, C.A., Margolis, R.L., et al. (2015). RAN translation in Huntington disease. *Neuron* 88, 667–677.
43. Neueder, A., Landles, C., Ghosh, R., Howland, D., Myers, R.H., Faull, R.L.M., Tabrizi, S.J., and Bates, G.P. (2017). The pathogenic exon 1 HTT protein is produced by incomplete splicing in Huntington's disease patients. *Sci. Rep.* 7, 1307.
44. Kay, C., Collins, J.A., Skotte, N.H., Southwell, A.L., Warby, S.C., Caron, N.S., Doty, C.N., Nguyen, B., Griguoli, A., Ross, C.J., et al. (2015). Huntingtin haplotypes provide prioritized target panels for allele-specific silencing in Huntington disease patients of European ancestry. *Mol. Ther.* 23, 1759–1771.
45. Chao, M.J., Gillis, T., Atwal, R.S., Mysore, J.S., Arjomand, J., Harold, D., Holmans, P., Jones, L., Orth, M., Myers, R.H., et al. (2017). Haplotype-based stratification of Huntington's disease. *Eur. J. Hum. Genet.* 25, 1202–1209.
46. Wick, R.R., Judd, L.M., and Holt, K.E. (2019). Performance of neural network basecalling tools for Oxford Nanopore sequencing. *Genome Biol.* 20, 129.
47. Wick, R.R., Judd, L.M., and Holt, K.E. (2018). Deepbinner: Demultiplexing barcoded Oxford Nanopore reads with deep convolutional neural networks. *PLoS Comput. Biol.* 14, e1006583.

**Human Genetics and Genomics Advances, Volume ■ ■**

**Supplemental information**

**Haplotyping SNPs for allele-specific  
gene editing of the expanded huntingtin  
allele using long-read sequencing**

**Li Fang, Alex Mas Monteys, Alexandra Dürr, Megan Keiser, Congsheng Cheng, Ahkil Harapanahalli, Pedro Gonzalez-Alegre, Beverly L. Davidson, and Kai Wang**

# Table of Contents

|                            |    |
|----------------------------|----|
| Supplemental Figures ..... | 3  |
| Figure S1 .....            | 3  |
| Figure S2 .....            | 4  |
| Figure S3 .....            | 4  |
| Figure S4 .....            | 6  |
| Figure S5 .....            | 7  |
| Figure S6 .....            | 8  |
| Figure S7 .....            | 9  |
| Figure S8 .....            | 10 |
| Figure S9 .....            | 11 |
| Figure S10 .....           | 12 |
| Figure S11 .....           | 13 |
| Figure S12 .....           | 14 |
| Supplemental Tables .....  | 15 |
| Table S1 .....             | 15 |
| Table S2 .....             | 16 |
| Table S3 .....             | 17 |
| Table S4 .....             | 18 |
| Table S5 .....             | 18 |
| Table S6 .....             | 18 |
| Table S7 .....             | 19 |
| Table S8 .....             | 20 |
| Table S9 .....             | 21 |
| Table S10 .....            | 22 |
| Table S11 .....            | 22 |
| Table S12 .....            | 22 |

|                              |    |
|------------------------------|----|
| Table S13 .....              | 22 |
| Table S14 .....              | 22 |
| Table S15 .....              | 23 |
| Table S16 .....              | 23 |
| Supplemental References..... | 23 |

## Supplemental Figures

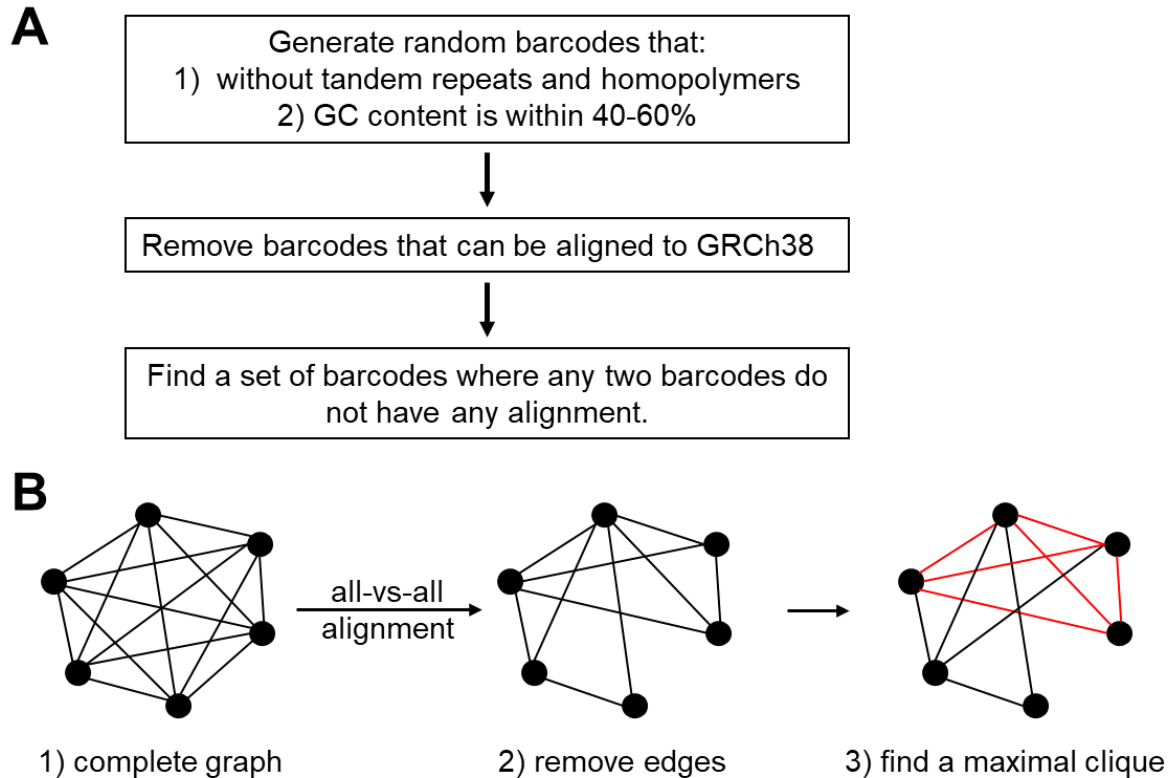

**Figure S1**

**Barcode design strategy used in this study.** **A)** The barcode design workflow. **B)** The algorithm to find a set of barcodes where any two barcodes do not have any alignment. 1) Each barcode was a node in the graph. Initially, all nodes are connected in the undirected graph. 2) An all-vs-all alignment of the barcode sequences was performed, and the edge between two barcodes (nodes) was removed if the two barcodes were aligned. 3) The remaining edges only connect barcode pairs that have no alignment. Therefore, a complete subgraph (clique) is a set of barcodes in which any two barcodes have no alignment.

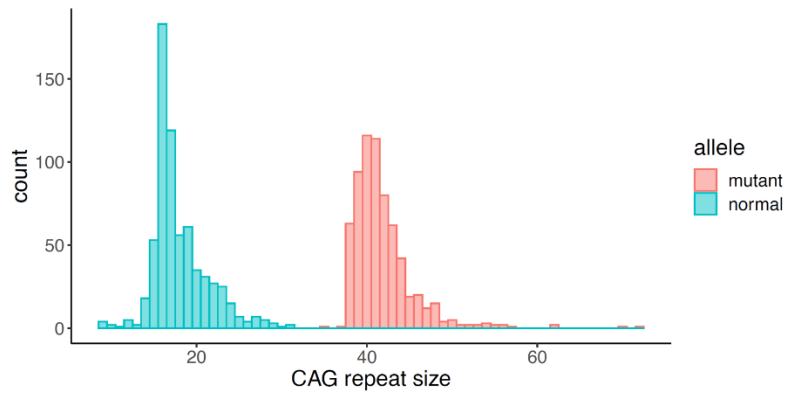

**Figure S2**

**Histogram of the CAG repeat size of the CHDI cohort.** The repeat was quantified by AmpRepeat using the Oxford Nanopore long-read sequencing data.

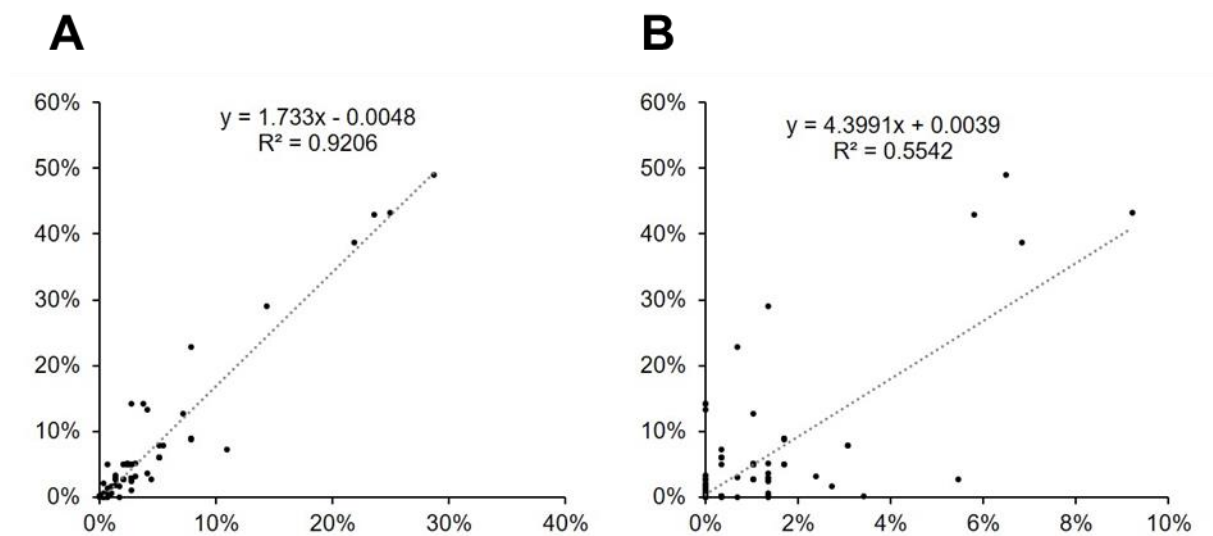

**Figure S3**

**Scatter plots showing the of AFs of SNPs in the CHDI HD cohort (Caucasians) and the gnomAD database (non-Finnish European population).** a) normal alleles; b) *mHTT* alleles.

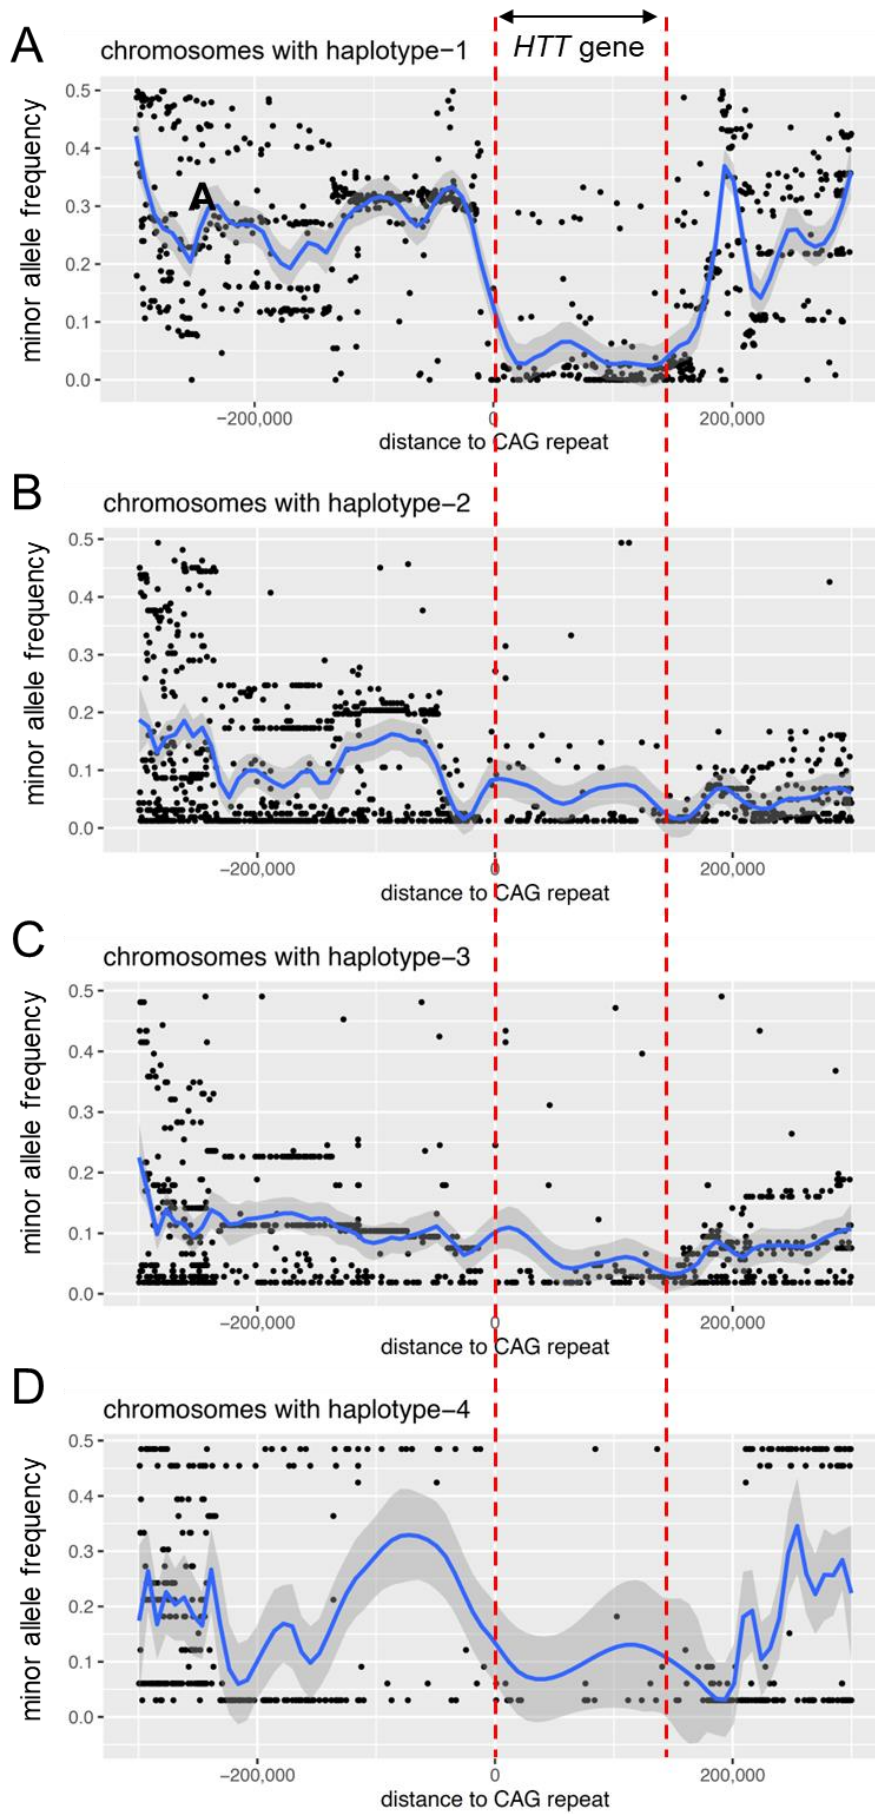

## Figure S4

**Minor allele frequencies of SNPs in chromosomes with haplotypes 1,2,3, and 4.** The data is based on 1000 Genomes individuals (phase 3 data set, non-Finnish European population). The region between dashed red lines is the HTT gene. Minor allele is the allele with frequency  $\leq 0.5$ .



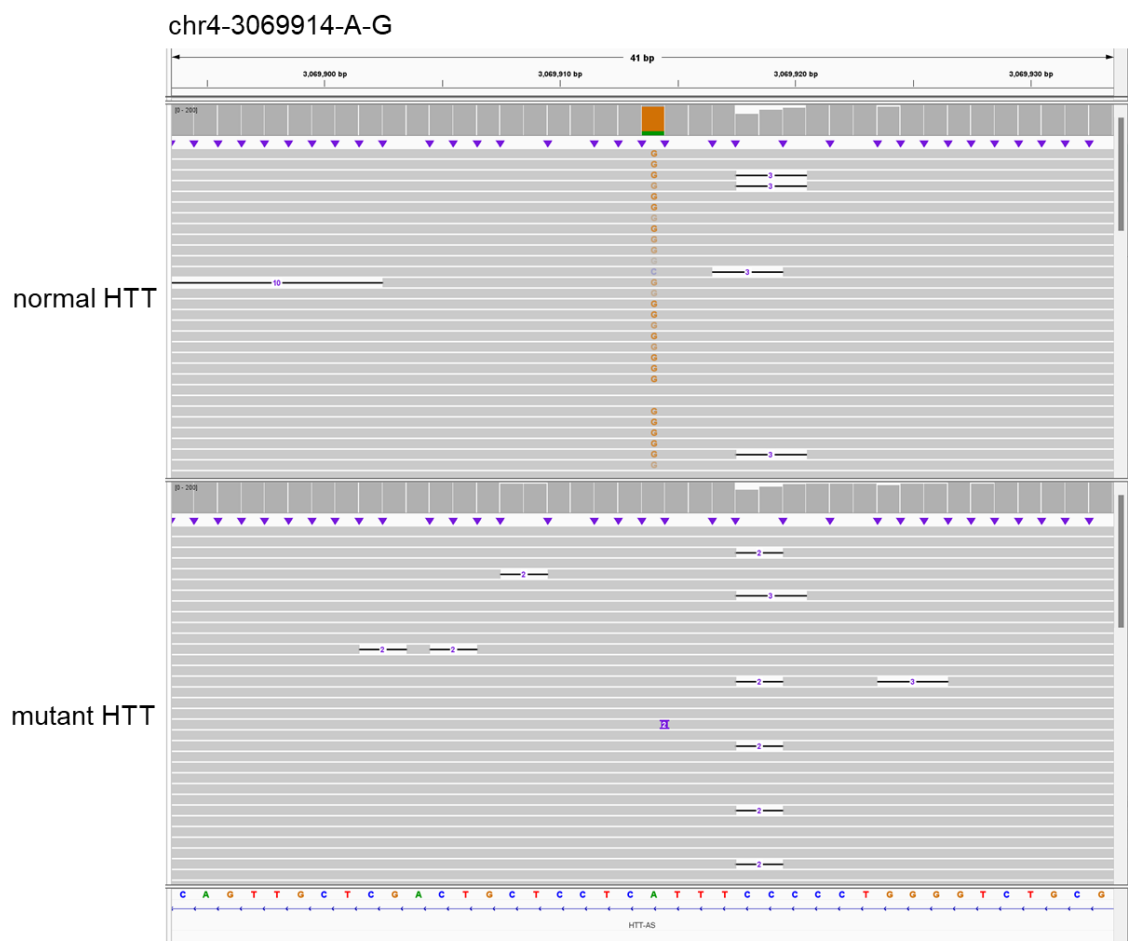

**Figure S5**

**Integrative Genomics Viewer (IGV) showing the aligned sequences around chr4:3069914 (GRCh38).** Matched bases are in grey and mismatched bases are colored. The mismatched bases indicate an SNP in the normal HTT but not in the mutant HTT.

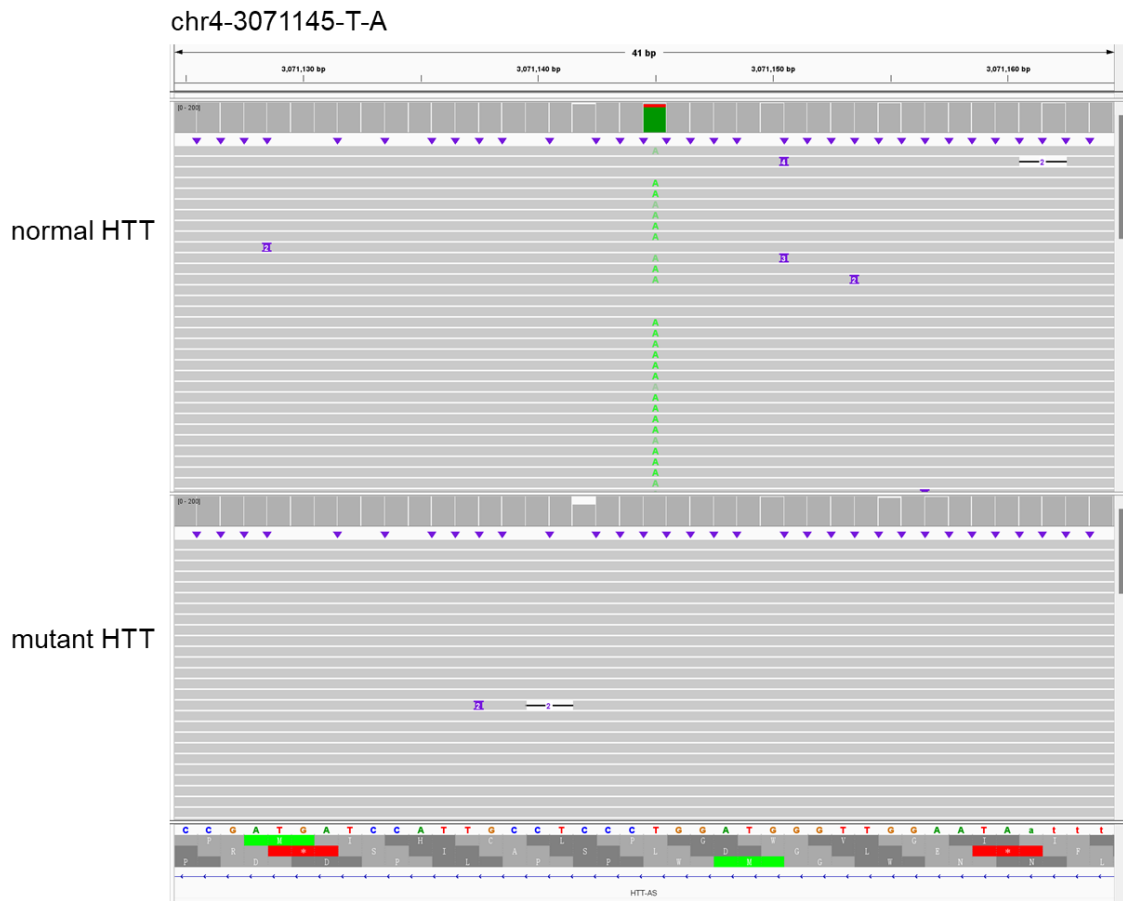

**Figure S6**

**Integrative Genomics Viewer (IGV) showing the aligned sequences around chr4:3071145 (GRCh38).** Matched bases are in grey and mismatched bases are colored. The mismatched bases indicate an SNP in the normal HTT but not in the mutant HTT.

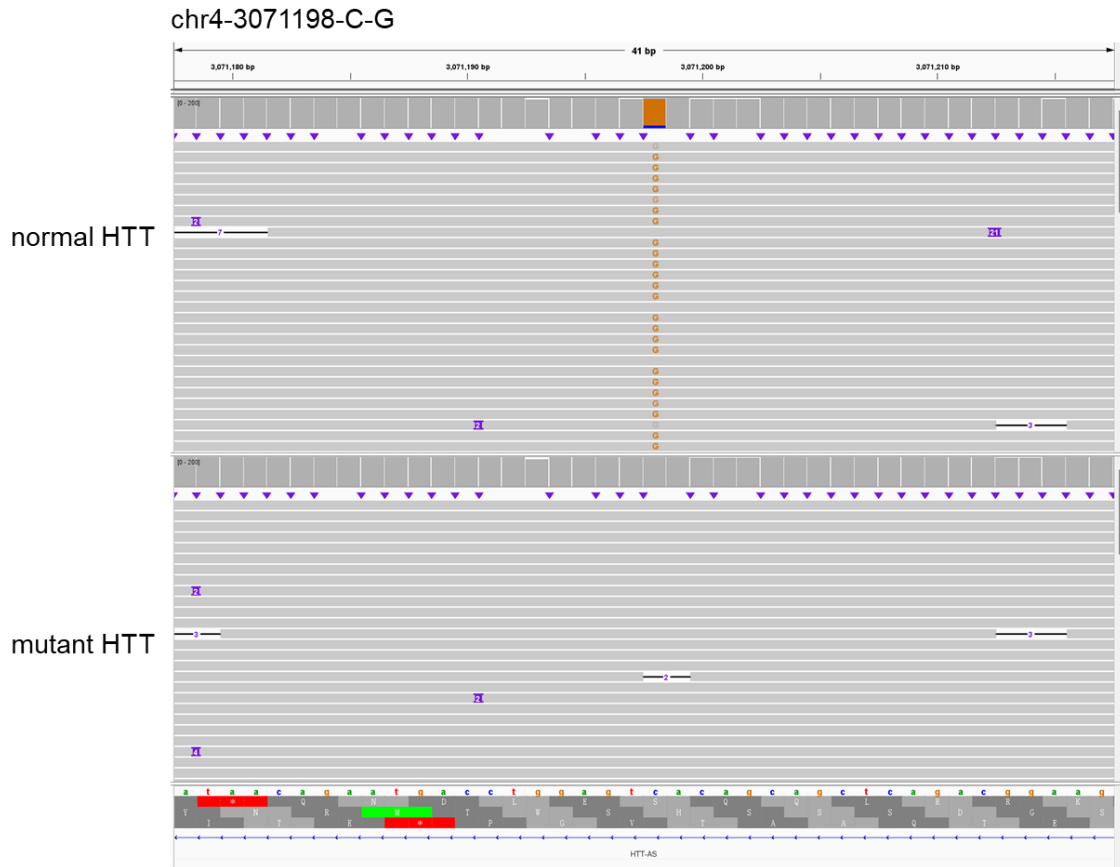

**Figure S7**

**Integrative Genomics Viewer (IGV) showing the aligned sequences around chr4:3071198 (GRCh38).** Matched bases are in grey and mismatched bases are colored. The mismatched bases indicate an SNP in the normal HTT but not in the mutant HTT.

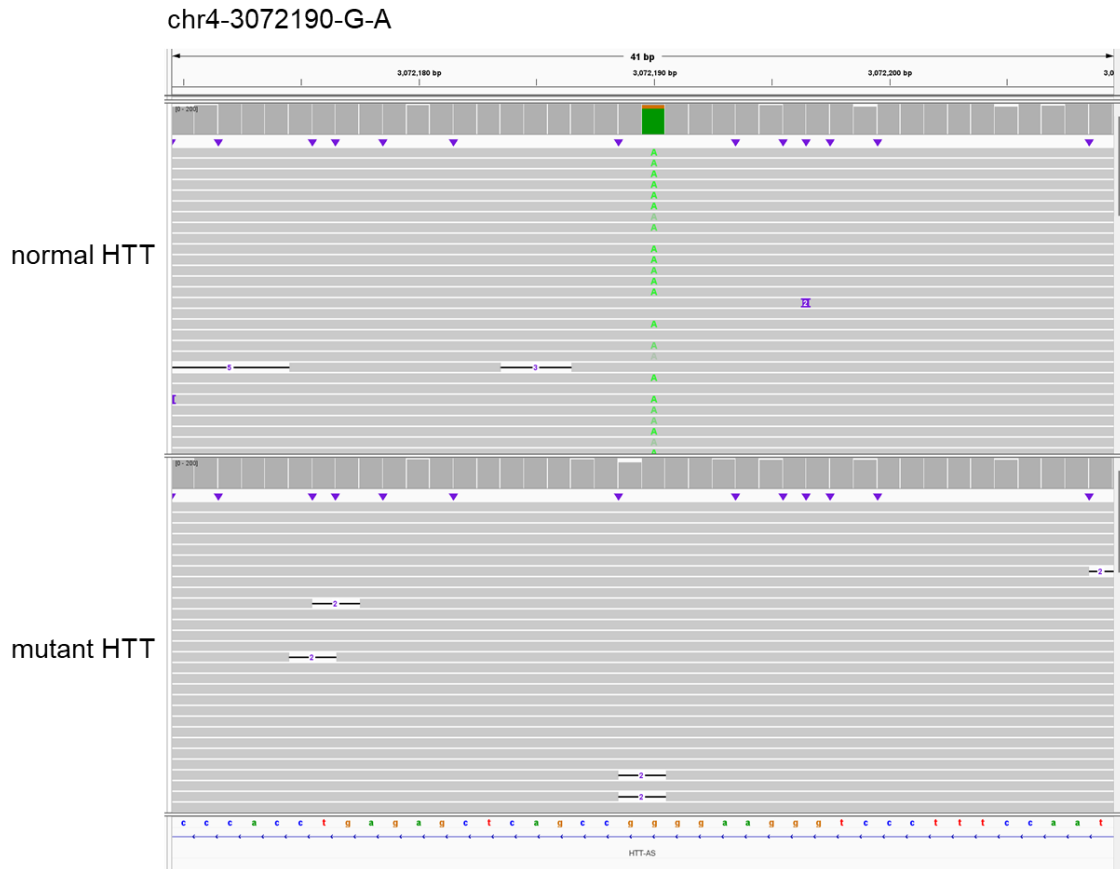

**Figure S8**

**Integrative Genomics Viewer (IGV) showing the aligned sequences around chr4:3072190 (GRCh38).** Matched bases are in grey and mismatched bases are colored. The mismatched bases indicate an SNP in the normal HTT but not in the mutant HTT.

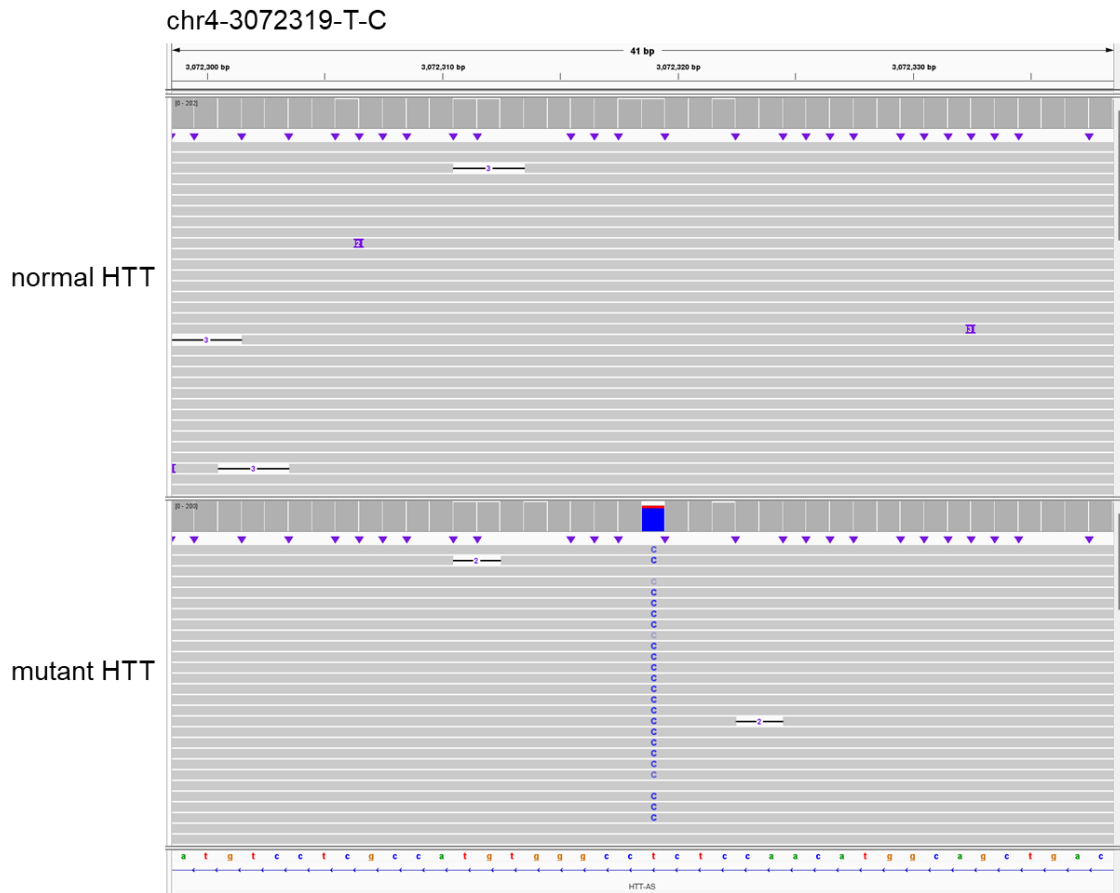

**Figure S9**

**Integrative Genomics Viewer (IGV) showing the aligned sequences around chr4:3072319 (GRCh38).** Matched bases are in grey and mismatched bases are colored. The mismatched bases indicate an SNP in the mutant HTT but not in the normal HTT.

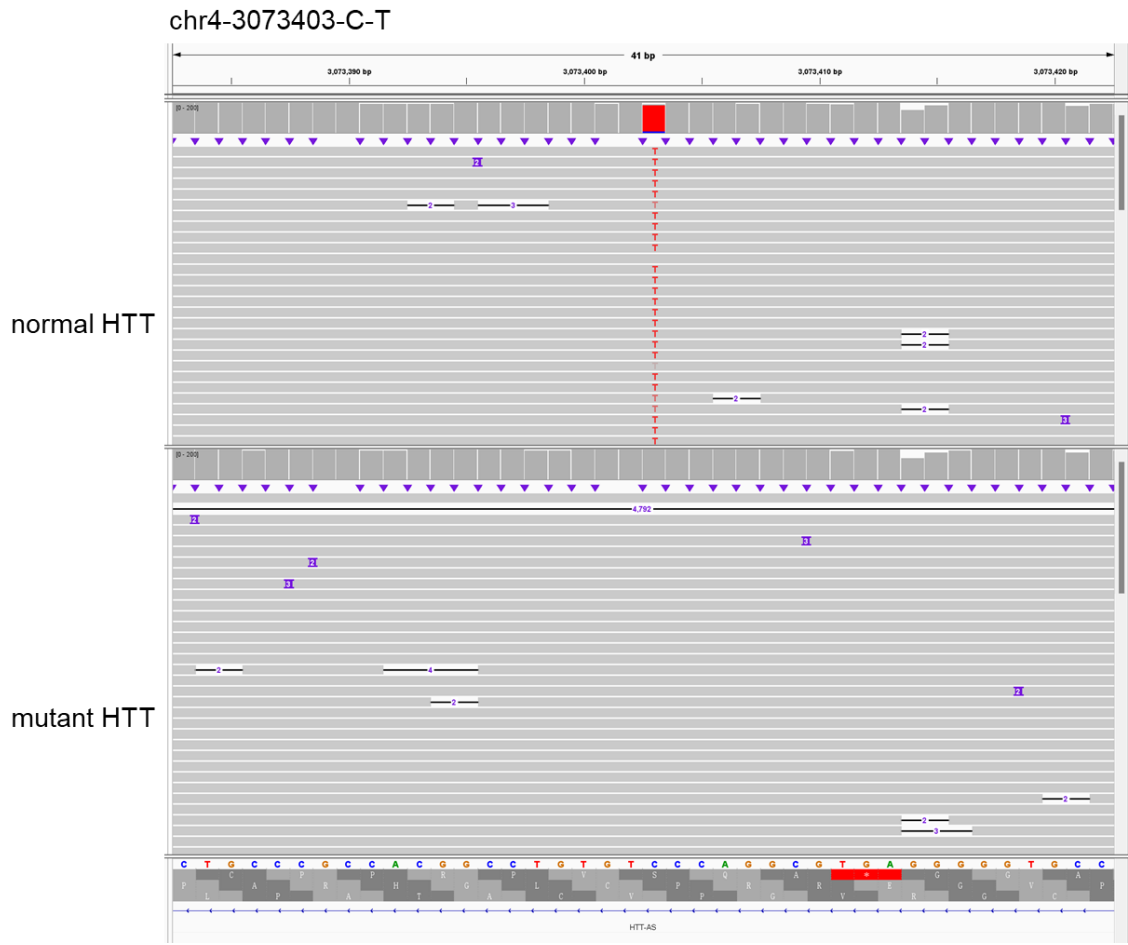

**Figure S10**

**Integrative Genomics Viewer (IGV) showing the aligned sequences around chr4:3073403 (GRCh38).** Matched bases are in grey and mismatched bases are colored. The mismatched bases indicate an SNP in the normal HTT but not in the mutant HTT.

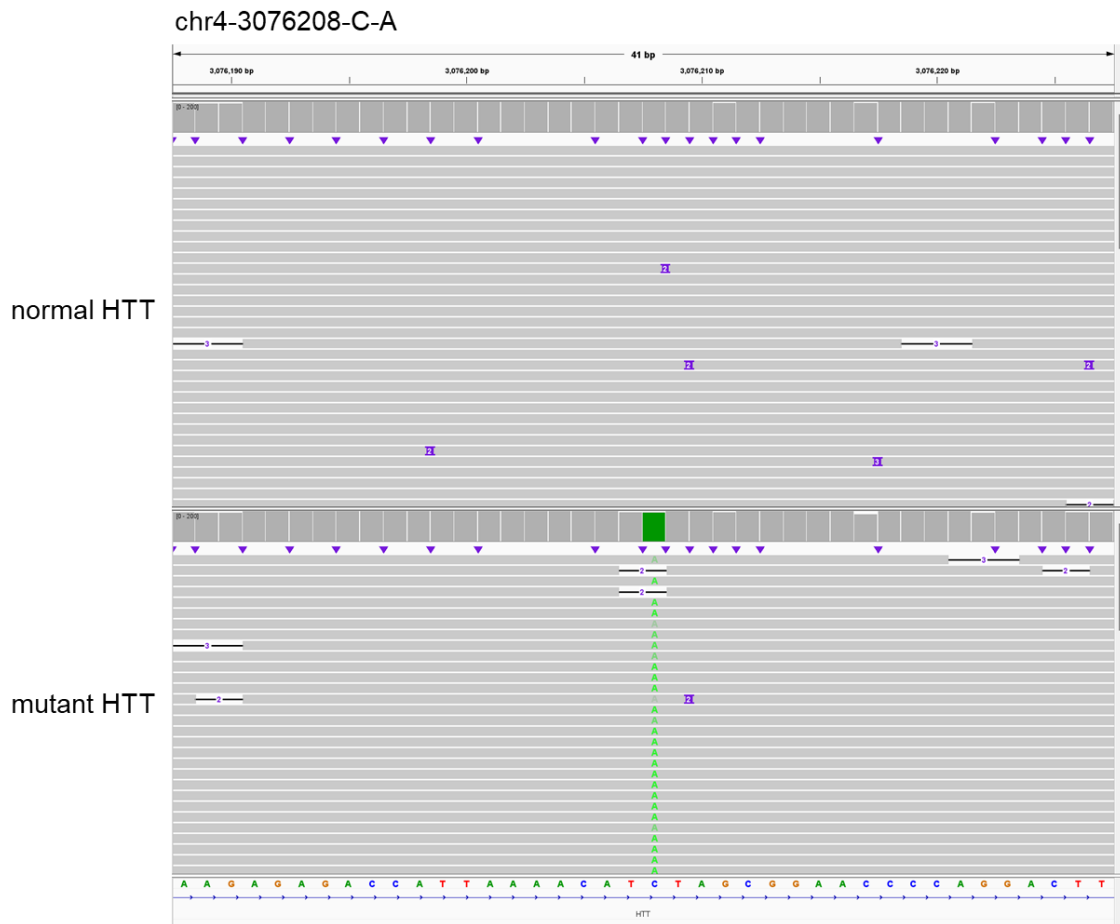

**Figure S11**

**Integrative Genomics Viewer (IGV) showing the aligned sequences around chr4:3076208 (GRCh38).** Matched bases are in grey and mismatched bases are colored. The mismatched bases indicate an SNP in the mutant HTT but not in the normal HTT.

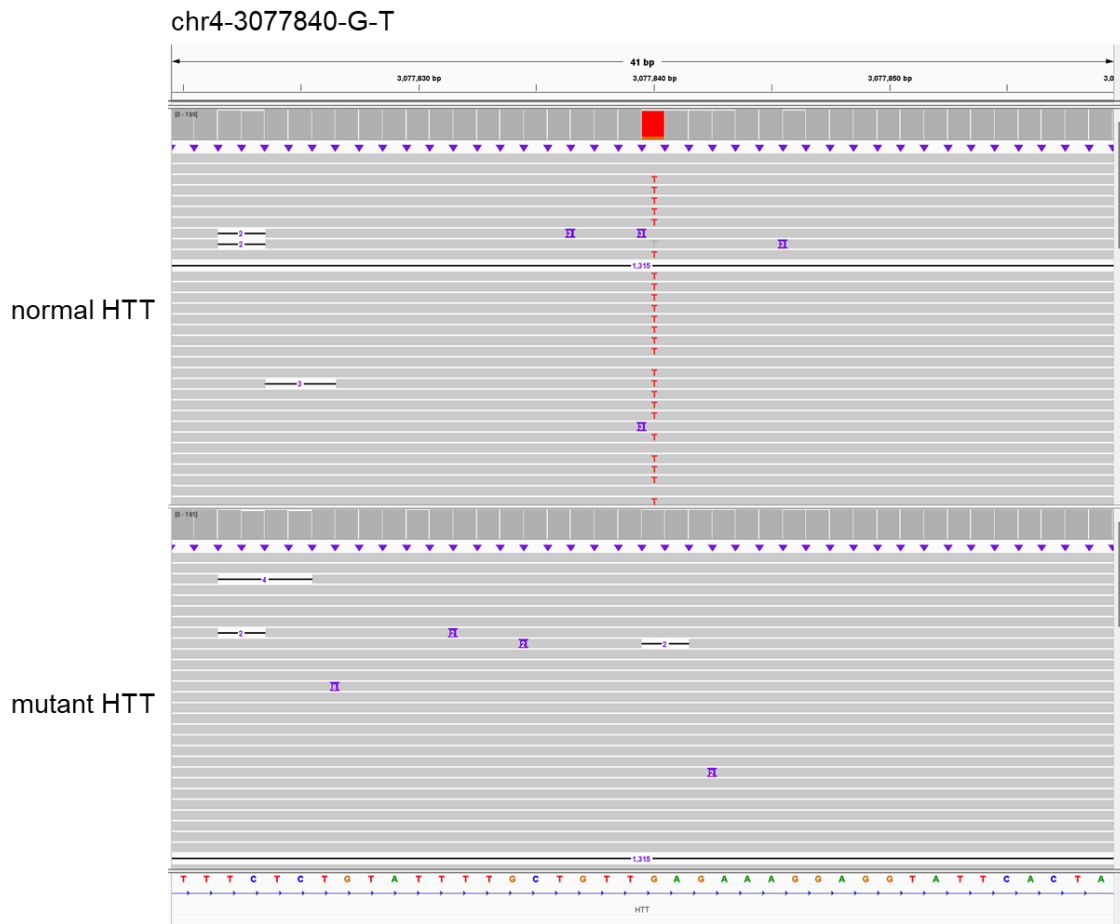

**Figure S12**

**Integrative Genomics Viewer (IGV) showing the aligned sequences around chr4:3077840 (GRCh38).** Matched bases are in grey and mismatched bases are colored. The mismatched bases indicate an SNP in the normal HTT but not in the mutant HTT.



## Supplemental Tables

**Table S1**

**Barcoded primers for amplicon-1.** The left part in the sequence is the barcode.

| <b>primer ID</b> | <b>primer sequence</b>                            | <b>direction</b> |
|------------------|---------------------------------------------------|------------------|
| A1B01F           | 5' -AATTCGCCAGTGATGC-AAAACGAGGGTTGTCAAAGACCCCA-3' | forward          |
| A1B02F           | 5' -CAGCCATTGATGTCGA-AAAACGAGGGTTGTCAAAGACCCCA-3' | forward          |
| A1B03F           | 5' -GGCCGCTAGTAATTCA-AAAACGAGGGTTGTCAAAGACCCCA-3' | forward          |
| A1B04F           | 5' -TCAGGCGCCGATTAAT-AAAACGAGGGTTGTCAAAGACCCCA-3' | forward          |
| A1B05F           | 5' -ACTAAGCGAGGTCTCT-AAAACGAGGGTTGTCAAAGACCCCA-3' | forward          |
| A1B06F           | 5' -CGTTCATCGAGTAAG-AAAACGAGGGTTGTCAAAGACCCCA-3'  | forward          |
| A1B07F           | 5' -ACTGTCAGACGATCG-AAAACGAGGGTTGTCAAAGACCCCA-3'  | forward          |
| A1B08F           | 5' -CCTCGACGTGGATAAT-AAAACGAGGGTTGTCAAAGACCCCA-3' | forward          |
| A1B09F           | 5' -GTACATCGGATGATCC-AAAACGAGGGTTGTCAAAGACCCCA-3' | forward          |
| A1B10F           | 5' -TACGGCGCTATTGAAC-AAAACGAGGGTTGTCAAAGACCCCA-3' | forward          |
| A1B01R           | 5' -AATTCGCCAGTGATGC-GAGGGAAGTGCCACTGAGCAAATCT-3' | reverse          |
| A1B02R           | 5' -CAGCCATTGATGTCGA-GAGGGAAGTGCCACTGAGCAAATCT-3' | reverse          |
| A1B03R           | 5' -GGCCGCTAGTAATTCA-GAGGGAAGTGCCACTGAGCAAATCT-3' | reverse          |
| A1B04R           | 5' -TCAGGCGCCGATTAAT-GAGGGAAGTGCCACTGAGCAAATCT-3' | reverse          |
| A1B05R           | 5' -ACTAAGCGAGGTCTCT-GAGGGAAGTGCCACTGAGCAAATCT-3' | reverse          |
| A1B06R           | 5' -CGTTCATCGAGTAAG-GAGGGAAGTGCCACTGAGCAAATCT-3'  | reverse          |
| A1B07R           | 5' -ACTGTCAGACGATCG-GAGGGAAGTGCCACTGAGCAAATCT-3'  | reverse          |
| A1B08R           | 5' -CCTCGACGTGGATAAT-GAGGGAAGTGCCACTGAGCAAATCT-3' | reverse          |
| A1B09R           | 5' -GTACATCGGATGATCC-GAGGGAAGTGCCACTGAGCAAATCT-3' | reverse          |
| A1B10R           | 5' -TACGGCGCTATTGAAC-GAGGGAAGTGCCACTGAGCAAATCT-3' | reverse          |

**Table S2****Barcoded primers for amplicon-2.** The left part in the sequence is the barcode.

| <b>primer ID</b> | <b>primer sequence</b>                                             | <b>direction</b> |
|------------------|--------------------------------------------------------------------|------------------|
| A2B01F           | 5'-CGTCGTTAACAGCGTACAGCCATTGATGTGCGA-AAAAGTCCCGATGATCCATTGCCTCC-3' | forward          |
| A2B02F           | 5'-CGATAGTCTTACGAGCGGCCGCTAGTAATTCA-AAAAGTCCCGATGATCCATTGCCTCC-3'  | forward          |
| A2B03F           | 5'-GCGAACGATCAGTCTTTCAGGCGCCGATTAAT-AAAAGTCCCGATGATCCATTGCCTCC-3'  | forward          |
| A2B04F           | 5'-TGCCATGGCGTATACAACCTAAGCGAGGTCTCT-AAAAGTCCCGATGATCCATTGCCTCC-3' | forward          |
| A2B05F           | 5'-AGCGCATCATTGGCATCGTTCATCGAGTAAG-AAAAGTCCCGATGATCCATTGCCTCC-3'   | forward          |
| A2B06F           | 5'-GACGACGTATGTACCTAATTCGCCAGTGATGC-AAAAGTCCCGATGATCCATTGCCTCC-3'  | forward          |
| A2B07F           | 5'-ATAAGTTGCGCACGCTACTGTTTCAGACGATCG-AAAAGTCCCGATGATCCATTGCCTCC-3' | forward          |
| A2B08F           | 5'-ATAACACGGTCCGGTTCCTCGACGTGGATAAT-AAAAGTCCCGATGATCCATTGCCTCC-3'  | forward          |
| A2B09F           | 5'-GGTTAGATTACGACCGTACATCGGATGATCC-AAAAGTCCCGATGATCCATTGCCTCC-3'   | forward          |
| A2B10F           | 5'-AACGGTTCATGAGCCTTACGGCGCTATTGAAC-AAAAGTCCCGATGATCCATTGCCTCC-3'  | forward          |
| A2B01R           | 5'-CGTCGTTAACAGCGTACAGCCATTGATGTGCGA-ACAAACCTGATAACGCAAGCTACTGC-3' | reverse          |
| A2B02R           | 5'-CGATAGTCTTACGAGCGGCCGCTAGTAATTCA-ACAAACCTGATAACGCAAGCTACTGC-3'  | reverse          |
| A2B03R           | 5'-GCGAACGATCAGTCTTTCAGGCGCCGATTAAT-ACAAACCTGATAACGCAAGCTACTGC-3'  | reverse          |
| A2B04R           | 5'-TGCCATGGCGTATACAACCTAAGCGAGGTCTCT-ACAAACCTGATAACGCAAGCTACTGC-3' | reverse          |
| A2B05R           | 5'-AGCGCATCATTGGCATCGTTCATCGAGTAAG-ACAAACCTGATAACGCAAGCTACTGC-3'   | reverse          |
| A2B06R           | 5'-GACGACGTATGTACCTAATTCGCCAGTGATGC-ACAAACCTGATAACGCAAGCTACTGC-3'  | reverse          |
| A2B07R           | 5'-ATAAGTTGCGCACGCTACTGTTTCAGACGATCG-ACAAACCTGATAACGCAAGCTACTGC-3' | reverse          |
| A2B08R           | 5'-ATAACACGGTCCGGTTCCTCGACGTGGATAAT-ACAAACCTGATAACGCAAGCTACTGC-3'  | reverse          |
| A2B09R           | 5'-AACGGTTCATGAGCCTTACGGCGCTATTGAAC-ACAAACCTGATAACGCAAGCTACTGC-3'  | reverse          |
| A2B10R           | 5'-GGTTAGATTACGACCGTACATCGGATGATCC-ACAAACCTGATAACGCAAGCTACTGC-3'   | reverse          |

**Table S3**

**Barcoded primers for amplicon-3.** The left part of the sequence is the barcode.

| <b>primer ID</b> | <b>primer sequence</b>                                            | <b>direction</b> |
|------------------|-------------------------------------------------------------------|------------------|
| A3B01F           | 5'-TCGTATCGTGAGCGTCAACCGACTGAGCATAA-AAAACGAGGGTTGTCAAAGACCCCA-3'  | forward          |
| A3B02F           | 5'-TTAGTCACTGTACAGCGTGAGCGTAGTTCAC-AAAACGAGGGTTGTCAAAGACCCCA-3'   | forward          |
| A3B03F           | 5'-ATCAGTACGTTGCTAGCTTGAGCGATAGCCAG-AAAACGAGGGTTGTCAAAGACCCCA-3'  | forward          |
| A3B04F           | 5'-AGTATGCACGACCGGATCTGTCAACGATACGT-AAAACGAGGGTTGTCAAAGACCCCA-3'  | forward          |
| A3B05F           | 5'-GAAGTCTAGATCAATCGTTAGCATCTGCTCGC-AAAACGAGGGTTGTCAAAGACCCCA-3'  | forward          |
| A3B06F           | 5'-AGACGTCTGACGATGCTCATAACCTGGACATC-AAAACGAGGGTTGTCAAAGACCCCA-3'  | forward          |
| A3B07F           | 5'-CTCATTCGATGTATGTGCGAGGTAGCAAGCAT-AAAACGAGGGTTGTCAAAGACCCCA-3'  | forward          |
| A3B08F           | 5'-TACTGTCGATTCGACCACGACTAGGCTATGCT-AAAACGAGGGTTGTCAAAGACCCCA-3'  | forward          |
| A3B09F           | 5'-CTGTACTCCGATGAACGGCGATCTAGTCTACG-AAAACGAGGGTTGTCAAAGACCCCA-3'  | forward          |
| A3B10F           | 5'-CGATGGTACTCAGATCGGCGACATCAGTTGAT-AAAACGAGGGTTGTCAAAGACCCCA-3'  | forward          |
| A3B11F           | 5'-AGTGCTAGTCGATGCCGCTGCATACCTATGAT-AAAACGAGGGTTGTCAAAGACCCCA-3'  | forward          |
| A3B12F           | 5'-ACATCTTACGGCTCGACTGGCAGCATGTCTGA-AAAACGAGGGTTGTCAAAGACCCCA-3'  | forward          |
| A3B13F           | 5'-ACTTAAGTCGAGTCGCATGCCTGTCGCTAGAT-AAAACGAGGGTTGTCAAAGACCCCA-3'  | forward          |
| A3B14F           | 5'-ATCAAGATGTACCACGTCAGGCTAGTACTGCT-AAAACGAGGGTTGTCAAAGACCCCA-3'  | forward          |
| A3B15F           | 5'-TCGAGCTTCGAGTGATAACGTAACGCTGCGTA-AAAACGAGGGTTGTCAAAGACCCCA-3'  | forward          |
| A3B16F           | 5'-GCAGATGACCACTACGTCGAACTGACTTGACT-AAAACGAGGGTTGTCAAAGACCCCA-3'  | forward          |
| A3B17F           | 5'-TCAGCATAGCGTCGATCACCAATGCATGCTAG-AAAACGAGGGTTGTCAAAGACCCCA-3'  | forward          |
| A3B18F           | 5'-CTCGATGACAGATGCGATACTGGCGTTCAATG-AAAACGAGGGTTGTCAAAGACCCCA-3'  | forward          |
| A3B19F           | 5'-GCGTCAGCTACGATTTGTATCCAAGTCTCGAT-AAAACGAGGGTTGTCAAAGACCCCA-3'  | forward          |
| A3B20F           | 5'-GACATTGACTGCTATGACGCCTTGAGTAGCAG-AAAACGAGGGTTGTCAAAGACCCCA-3'  | forward          |
| A3B21F           | 5'-AGCAACGCTAGTGGCCGCTATGTACTAGTCTCG-AAAACGAGGGTTGTCAAAGACCCCA-3' | forward          |
| A3B22F           | 5'-TACATCTGGCGAGTATGATCCTACGGTGAGTC-AAAACGAGGGTTGTCAAAGACCCCA-3'  | forward          |
| A3B23F           | 5'-ATCAGCTGTTACGATAGGCGACTCGCCATCGA-AAAACGAGGGTTGTCAAAGACCCCA-3'  | forward          |
| A3B24F           | 5'-CGCACTAGTATCAGCCTAAGCACTCGTGATGG-AAAACGAGGGTTGTCAAAGACCCCA-3'  | forward          |
| A3B01R           | 5'-TCGTATCGTGAGCGTCAACCGACTGAGCATAA-ACAAACCTGATAACGCAAGCTACTGC-3' | reverse          |
| A3B02R           | 5'-TTAGTCACTGTACAGCGTGAGCGTAGTTCAC-ACAAACCTGATAACGCAAGCTACTGC-3'  | reverse          |
| A3B03R           | 5'-ATCAGTACGTTGCTAGCTTGAGCGATAGCCAG-ACAAACCTGATAACGCAAGCTACTGC-3' | reverse          |
| A3B04R           | 5'-AGTATGCACGACCGGATCTGTCAACGATACGT-ACAAACCTGATAACGCAAGCTACTGC-3' | reverse          |
| A3B05R           | 5'-GAAGTCTAGATCAATCGTTAGCATCTGCTCGC-ACAAACCTGATAACGCAAGCTACTGC-3' | reverse          |
| A3B06R           | 5'-AGACGTCTGACGATGCTCATAACCTGGACATC-ACAAACCTGATAACGCAAGCTACTGC-3' | reverse          |
| A3B07R           | 5'-CTCATTCGATGTATGTGCGAGGTAGCAAGCAT-ACAAACCTGATAACGCAAGCTACTGC-3' | reverse          |
| A3B08R           | 5'-TACTGTCGATTCGACCACGACTAGGCTATGCT-ACAAACCTGATAACGCAAGCTACTGC-3' | reverse          |
| A3B09R           | 5'-CTGTACTCCGATGAACGGCGATCTAGTCTACG-ACAAACCTGATAACGCAAGCTACTGC-3' | reverse          |
| A3B10R           | 5'-CGATGGTACTCAGATCGGCGACATCAGTTGAT-ACAAACCTGATAACGCAAGCTACTGC-3' | reverse          |
| A3B11R           | 5'-AGTGCTAGTCGATGCCGCTGCATACCTATGAT-ACAAACCTGATAACGCAAGCTACTGC-3' | reverse          |
| A3B12R           | 5'-ACATCTTACGGCTCGACTGGCAGCATGTCTGA-ACAAACCTGATAACGCAAGCTACTGC-3' | reverse          |
| A3B13R           | 5'-ACTTAAGTCGAGTCGCATGCCTGTCGCTAGAT-ACAAACCTGATAACGCAAGCTACTGC-3' | reverse          |
| A3B14R           | 5'-ATCAAGATGTACCACGTCAGGCTAGTACTGCT-ACAAACCTGATAACGCAAGCTACTGC-3' | reverse          |
| A3B15R           | 5'-TCGAGCTTCGAGTGATAACGTAACGCTGCGTA-ACAAACCTGATAACGCAAGCTACTGC-3' | reverse          |
| A3B16R           | 5'-GCAGATGACCACTACGTCGAACTGACTTGACT-ACAAACCTGATAACGCAAGCTACTGC-3' | reverse          |
| A3B17R           | 5'-TCAGCATAGCGTCGATCACCAATGCATGCTAG-ACAAACCTGATAACGCAAGCTACTGC-3' | reverse          |
| A3B18R           | 5'-CTCGATGACAGATGCGATACTGGCGTTCAATG-ACAAACCTGATAACGCAAGCTACTGC-3' | reverse          |
| A3B19R           | 5'-GCGTCAGCTACGATTTGTATCCAAGTCTCGAT-ACAAACCTGATAACGCAAGCTACTGC-3' | reverse          |
| A3B20R           | 5'-GACATTGACTGCTATGACGCCTTGAGTAGCAG-ACAAACCTGATAACGCAAGCTACTGC-3' | reverse          |

|        |                                                                   |         |
|--------|-------------------------------------------------------------------|---------|
| A3B21R | 5'-AGCAACGCTAGTGGCCGCTATGTACTAGCTCG-ACAAACCTGATAACGCAAGCTACTGC-3' | reverse |
| A3B22R | 5'-TACATCTGGCGAGTATGATCCTACGGTGAGTC-ACAAACCTGATAACGCAAGCTACTGC-3' | reverse |
| A3B23R | 5'-ATCAGCTGTTACGATAGGCGACTCGCCATCGA-ACAAACCTGATAACGCAAGCTACTGC-3' | reverse |
| A3B24R | 5'-CGCACTAGTATCAGCCTAAGCACTCGTGATGG-ACAAACCTGATAACGCAAGCTACTGC-3' | reverse |

**Table S4**

**SNP frequencies in normal and mutant HTT.** The SNPs are annotated with frequencies in different databases including GnomAD v3.0, GnomAD v2.1.1, and 1000 Genomes Project Phase 3. (in a separate Excel file)

**Table S5**

**CRISPR enzymes and PAMs analyzed in this study.**

| Enzyme      | High efficiency PAMs (included)                | Low efficiency PAMs (excluded)                                                                                                                                                                                                                                    | Reference |
|-------------|------------------------------------------------|-------------------------------------------------------------------------------------------------------------------------------------------------------------------------------------------------------------------------------------------------------------------|-----------|
| SpCas9      | NGG, NAG                                       | -                                                                                                                                                                                                                                                                 | -         |
| SpCas9_VQR  | NGAG, NGAT, NGAC, NGAA, NGCG, NGTG, NGGG, NAAG | NGGA, NGGT, NGGC                                                                                                                                                                                                                                                  | (1)       |
| SpCas9_EQR  | NGAG, NGCG, NGAT, NGAA                         | NGGG, NGTG, NGAC                                                                                                                                                                                                                                                  | (1)       |
| SpCas9_VRER | NGCG                                           | -                                                                                                                                                                                                                                                                 | (1)       |
| SaCas9      | NGGGT, NGAAT, NGAGT, NGGAT                     | NGGAA, NGGAC, NGAAT, NGGCA, NGGGA, NGATC, NGGAG, NGATT, NGGTA, NGGTT, NGACA, NGATA, NGGGC, NGGGG, NGAGC, NGACC, NGAAG, NGGCT, NGCAT, NGACG, NGCGT, NGCAC, NGATG, NAAAT, NAGGT, NGGCG, NGTTT, NGGCC, NGCTT, NCAGT, NGCGA, NGGTG, NGGTC, NCGAT, NGCAA, NAGAT, NGTGT | (1)       |
| AsCpf1      | TTN                                            | -                                                                                                                                                                                                                                                                 | (2)       |

**Table S6**

**SNPs carried by each haplotype.** The genome coordinates are based on GRCh38. '0' indicates the reference allele and '1' indicates the alternative allele. (in a separate Excel file)

**Table S7**

**Upstream SNPs with AF > 20% in the chromosomes with haplotype-1.** The analysis was based on the 1000 Genomes Project Phase 3 dataset. AF NFE means the allele frequency of the non-Finnish European population.

| Position (GRCh38) | Ref allele | Alt allele | Distance to exon-1 | AF NFE | AF NFE with Hap1 | AF NFE without Hap1 | Ref motif | Alt motif | Enzyme      | Strand   | Effect on the PAM |
|-------------------|------------|------------|--------------------|--------|------------------|---------------------|-----------|-----------|-------------|----------|-------------------|
| 3062277           | G          | A          | -12404             | 36.8%  | 61.3%            | 16.3%               | GG[C]G    | GG[T]G    | SpCas9_VRER | negative | loss              |
| 3060438           | A          | G          | -14243             | 48.1%  | 70.6%            | 29.5%               | TT[T]G    | TT[C]G    | AsCpf1      | negative | loss              |
| 3060438           | A          | G          | -14243             | 48.1%  | 70.6%            | 29.5%               | C[A]AA    | C[G]AA    | SpCas9_VQR  | positive | gain              |
| 3060438           | A          | G          | -14243             | 48.1%  | 70.6%            | 29.5%               | C[A]AA    | C[G]AA    | SpCas9_EQR  | positive | gain              |
| 3059924           | G          | T          | -14757             | 51.7%  | 71.4%            | 35.4%               | TT[G]T    | TT[T]T    | AsCpf1      | positive | gain              |
| 3059924           | G          | T          | -14757             | 51.7%  | 71.4%            | 35.4%               | T[G]TT    | T[T]TT    | AsCpf1      | positive | gain              |
| 3059924           | G          | T          | -14757             | 51.7%  | 71.4%            | 35.4%               | [G]TTT    | [T]TTT    | AsCpf1      | positive | gain              |
| 3058322           | G          | C          | -16359             | 50.2%  | 69.8%            | 34.0%               | GA[C]     | GA[G]     | SpCas9      | negative | gain              |
| 3058322           | G          | C          | -16359             | 50.2%  | 69.8%            | 34.0%               | A[C]AG    | A[G]AG    | SpCas9_VQR  | negative | gain              |
| 3058322           | G          | C          | -16359             | 50.2%  | 69.8%            | 34.0%               | A[C]AG    | A[G]AG    | SpCas9_EQR  | negative | gain              |
| 3056856           | A          | G          | -17825             | 47.8%  | 69.8%            | 29.5%               | CA[A]     | CA[G]     | SpCas9      | positive | gain              |
| 3056181           | T          | C          | -18500             | 52.0%  | 70.0%            | 37.0%               | C[A]TG    | C[G]TG    | SpCas9_VQR  | negative | gain              |
| 3056082           | A          | G          | -18599             | 54.8%  | 70.6%            | 41.7%               | T[T]TC    | T[C]TC    | AsCpf1      | negative | loss              |
| 3056082           | A          | G          | -18599             | 54.8%  | 70.6%            | 41.7%               | GA[A]     | GA[G]     | SpCas9      | positive | gain              |
| 3056082           | A          | G          | -18599             | 54.8%  | 70.6%            | 41.7%               | A[A]AT    | A[G]AT    | SpCas9_VQR  | positive | gain              |
| 3056082           | A          | G          | -18599             | 54.8%  | 70.6%            | 41.7%               | A[A]AT    | A[G]AT    | SpCas9_EQR  | positive | gain              |
| 3055248           | T          | G          | -19433             | 54.8%  | 70.6%            | 41.7%               | TG[T]     | TG[G]     | SpCas9      | positive | gain              |
| 3055248           | T          | G          | -19433             | 54.8%  | 70.6%            | 41.7%               | G[T]G     | G[G]G     | SpCas9      | positive | gain              |
| 3055248           | T          | G          | -19433             | 54.8%  | 70.6%            | 41.7%               | TG[T]GAT  | TG[G]GAT  | SaCas9      | positive | gain              |

**Table S8**

**Downstream SNPs with AF > 20% in the chromosomes with haplotype-1.** The analysis was based on the 1000 Genomes Project Phase 3 dataset. AF NFE means the allele frequency of the non-Finnish European population.

| Position (GRCh38) | Accession Number | Nearest exon | Distance to exon-1 | AF NFE | AF NFE with Hap1 | AF NFE without Hap1 | Ref motif  | Alt motif  | Enzyme     | Strand   | Effect on PAM |
|-------------------|------------------|--------------|--------------------|--------|------------------|---------------------|------------|------------|------------|----------|---------------|
| 3095768           | rs28820097       | exon-3       | 20680              | 39.9%  | 71.1%            | 13.8%               | TT [C] C   | TT [T] C   | AsCpf1     | negative | gain          |
| 3095768           | rs28820097       | exon-3       | 20680              | 39.9%  | 71.1%            | 13.8%               | AG [G]     | AG [A]     | SpCas9     | positive | loss          |
| 3095768           | rs28820097       | exon-3       | 20680              | 39.9%  | 71.1%            | 13.8%               | G [G] AA   | G [A] AA   | SpCas9_VQR | positive | loss          |
| 3095768           | rs28820097       | exon-3       | 20680              | 39.9%  | 71.1%            | 13.8%               | AG [G] A   | AG [A] A   | SpCas9_EQR | positive | gain          |
| 3095768           | rs28820097       | exon-3       | 20680              | 39.9%  | 71.1%            | 13.8%               | G [G] AA   | G [A] AA   | SpCas9_EQR | positive | loss          |
| 3095768           | rs28820097       | exon-3       | 20680              | 39.9%  | 71.1%            | 13.8%               | AG [G] AAT | AG [A] AAT | SaCas9     | positive | loss          |
| 3107715           | rs10015979       | exon-6       | 32627              | 40.6%  | 71.4%            | 15.0%               | TA [A]     | TA [G]     | SpCas9     | positive | gain          |
| 3132184           | rs363080         | exon-17      | 57096              | 16.5%  | 27.2%            | 7.5%                | C [G] AG   | C [A] AG   | SpCas9_EQR | negative | loss          |
| 3142714           | rs363107         | exon-23      | 67626              | 16.8%  | 28.1%            | 7.5%                | TT [T] A   | TT [C] A   | AsCpf1     | negative | loss          |
| 3142714           | rs363107         | exon-23      | 67626              | 16.8%  | 28.1%            | 7.5%                | T [A] AA   | T [G] AA   | SpCas9_VQR | positive | gain          |
| 3142714           | rs363107         | exon-23      | 67626              | 16.8%  | 28.1%            | 7.5%                | T [A] AA   | T [G] AA   | SpCas9_EQR | positive | gain          |
| 3150086           | rs11731237       | exon-26      | 74998              | 35.5%  | 66.8%            | 9.5%                | TT [C] C   | TT [T] C   | AsCpf1     | positive | gain          |
| 3150086           | rs11731237       | exon-26      | 74998              | 35.5%  | 66.8%            | 9.5%                | AG [G]     | AG [A]     | SpCas9     | negative | loss          |
| 3150086           | rs11731237       | exon-26      | 74998              | 35.5%  | 66.8%            | 9.5%                | G [G] AA   | G [A] AA   | SpCas9_VQR | negative | loss          |
| 3150086           | rs11731237       | exon-26      | 74998              | 35.5%  | 66.8%            | 9.5%                | AG [G] A   | AG [A] A   | SpCas9_EQR | negative | gain          |
| 3150086           | rs11731237       | exon-26      | 74998              | 35.5%  | 66.8%            | 9.5%                | G [G] AA   | G [A] AA   | SpCas9_EQR | negative | loss          |
| 3158750           | rs363146         | exon-29      | 83662              | 100.0% | 100.0%           | 100.0%              | TG [A]     | TG [G]     | SpCas9     | positive | gain          |
| 3158750           | rs363146         | exon-29      | 83662              | 100.0% | 100.0%           | 100.0%              | G [A] GG   | G [G] GG   | SpCas9_VQR | positive | gain          |
| 3164523           | rs9884693        | exon-29      | 89435              | 38.5%  | 67.6%            | 14.3%               | TG [G]     | TG [A]     | SpCas9     | positive | loss          |
| 3164523           | rs9884693        | exon-29      | 89435              | 38.5%  | 67.6%            | 14.3%               | G [G] GG   | G [A] GG   | SpCas9_VQR | positive | loss          |

**Table S9**

**Estimated miss-classification rate of demultiplexing.** Each sequencing run has 95 real samples and 5 blank samples. The mis-classification rate was calculated as the average number of reads in blank samples divided by the average number of reads in real samples.

|                                                 | Round 1 PCR (16 bp barcode) |        |        |        |        | Round 2 PCR (32 bp barcode) |         |         |         |
|-------------------------------------------------|-----------------------------|--------|--------|--------|--------|-----------------------------|---------|---------|---------|
|                                                 | plate1                      | plate2 | plate3 | plate4 | plate5 | plate 1                     | plate 2 | plate 3 | plate 4 |
| number of reads assigned to one of the 100 bins | 29872                       | 50653  | 48452  | 98692  | 117591 | 520487                      | 426535  | 602341  | 378664  |
| number of reads assigned to 95 samples          | 29870                       | 50649  | 48451  | 98689  | 117582 | 520343                      | 426465  | 602265  | 378569  |
| number of reads assigned to 5 blank samples     | 2                           | 4      | 1      | 3      | 9      | 144                         | 70      | 76      | 95      |
| miss-classification rate                        | 0.13%                       | 0.15%  | 0.04%  | 0.06%  | 0.15%  | 0.53%                       | 0.31%   | 0.24%   | 0.48%   |
| average number of reads per sample              | 314                         | 533    | 510    | 1039   | 1238   | 5477                        | 4489    | 6340    | 3985    |

**Table S10**

**The list of filtered STR regions in CHM13 for evaluation of repeat quantification.** This list includes all STR regions that are > 100 bp and not within a 500 bp flanking region of another STR. We removed adjacent STRs because many of the adjacent STRs have similar sequences and it is hard to tell if they need to be merged or not without manual examination. Percent\_match and percent\_indel were calculated by Tandem Repeat Finder (TRF) v4.09. (in a separate Excel file)

**Table S11**

**Detailed information of the CHDI cohort.** Race, sex, region, and CAG repeat size (measured by PCR-based Fragment Analysis) of each subject are shown. Subjects are deidentified. This information was provided by the CHDI foundation. (in a separate Excel file)

**Table S12**

**Number of samples of each ethnic group included in the CHDI cohort.**

|                           | <b># of samples</b> | <b># of QC-passed samples</b> |
|---------------------------|---------------------|-------------------------------|
| American Black            | 22                  | 16                            |
| American Indian           | 6                   | 5                             |
| Asian                     | 6                   | 5                             |
| Caucasian                 | 825                 | 610                           |
| Hispanic or Latino Origin | 73                  | 53                            |
| Mixed                     | 18                  | 12                            |
| Other                     | 10                  | 7                             |

**Table S13**

**Phased SNPs of each individual in the French cohort (in a separate Excel file).** The genome coordinates are based on GRCh38. (in a separate Excel file)

**Table S14**

**Phased SNPs of each individual in the CHDI cohort (in a separate Excel file).** The genome coordinates are based on GRCh38. (in a separate Excel file)



### **Table S15**

**CAG and CCG repeat sizes for the French cohort.** The repeat sizes were quantified by NanoRepeat from Oxford Nanopore long reads. (in a separate Excel file).

### **Table S16**

**CAG and CCG repeat sizes for the CHDI cohort.** The repeat sizes were quantified by NanoRepeat from Oxford Nanopore long reads. (in a separate Excel file).

## **Supplemental References**

1. Kleinstiver BP, Prew MS, Tsai SQ, Topkar VV, Nguyen NT, Zheng Z, et al. Engineered CRISPR-Cas9 nucleases with altered PAM specificities. *Nature*. 2015;523(7561):481-5.
2. Zetsche B, Gootenberg JS, Abudayyeh OO, Slaymaker IM, Makarova KS, Essletzbichler P, et al. Cpf1 is a single RNA-guided endonuclease of a class 2 CRISPR-Cas system. *Cell*. 2015;163(3):759-71.
